# Supplementary material for: Identification of Potential Hub Genes and miRNA-mRNA Pairs Related to the Progression and Prognosis of Cervical Cancer Through Integrated Bioinformatics Analysis
Source: Front Genet. 2021 Dec 22;12:775006. doi: 10.3389/fgene.2021.775006 (PMC8727538; doi:10.3389/fgene.2021.775006)
Supplement: Supplementary file 7 [file Table6.XLSX]

## Sheet: supplementary material 2
Tag	logFC	AveExpr	t	P.Value	adj.P.Val	B
ABCC8	-1.61069	-0.0316017	-7.20096	4.07e-09	6.99e-08	10.6348
ABCG2	-1.44779	0.0404387	-13.244	1.8e-17	1.87e-14	29.5617
ABP1	-1.00327	0.0752193	-6.6945	2.39e-08	3.08e-07	8.89327
ABRA	-1.0549	-0.168877	-9.18208	4.71e-12	2.7e-10	17.3073
ACADL	-1.08068	0.0671944	-5.84962	4.56e-07	3.79e-06	5.99616
ACCN1	-1.28537	-0.22089	-3.49015	0.00106105	0.00304467	-1.50398
ACOT7	1.13996	-0.396398	5.9869	2.83e-07	2.52e-06	6.46444
ACOX2	-1.08397	0.0383309	-8.48508	4.89e-11	1.83e-09	14.9976
ACTA2	-1.6725	-0.175765	-5.55342	1.27e-06	9e-06	4.99158
ACTG2	-2.38197	-0.446498	-5.4284	1.95e-06	1.3e-05	4.5705
ACTL6A	1.12663	-0.265482	5.75712	6.28e-07	4.97e-06	5.6815
ACTN2	-1.24932	-0.12118	-7.12654	5.28e-09	8.69e-08	10.3793
ADA	1.0293	-0.378207	6.10118	1.9e-07	1.79e-06	6.85528
ADAM20	-1.29547	0.0376614	-7.0346	7.28e-09	1.13e-07	10.0633
ADAM8	1.47786	-0.518364	4.98367	8.91e-06	4.81e-05	3.09166
ADAMDEC1	1.49363	-0.548635	4.85732	1.36e-05	6.94e-05	2.67805
ADAMTS19	-1.35048	-0.245524	-7.60253	1.01e-09	2.18e-08	12.0103
ADAMTS5	-1.4817	0.217854	-9.34014	2.79e-12	1.78e-10	17.8237
ADCY4	-1.28861	0.0116864	-9.69649	8.66e-13	7.35e-11	18.9775
ADM	1.39119	-0.582793	4.61978	3.01e-05	0.00013807	1.91011
ADORA3	-1.05731	-0.146947	-7.43123	1.83e-09	3.6e-08	11.4245
ADRA1A	-1.371	-0.278977	-8.84024	1.47e-11	6.83e-10	16.1808
ADRA2A	-1.26593	0.0475932	-6.39364	6.83e-08	7.57e-07	7.85855
ADRA2C	-1.73222	-0.332132	-5.04555	7.22e-06	4.02e-05	3.29537
AGER	-1.01345	-0.0542977	-5.84394	4.65e-07	3.85e-06	5.97679
AGT	-1.43124	0.00594114	-8.39944	6.54e-11	2.31e-09	14.7105
AICDA	-1.05202	-0.190041	-6.07156	2.1e-07	1.96e-06	6.75388
AIM2	2.2284	-0.68369	4.89794	1.19e-05	6.17e-05	2.81065
ALDH1A1	-1.14151	-0.403014	-2.89757	0.00569734	0.0131051	-3.07379
ALOX12	-1.24319	0.0393377	-4.89996	1.18e-05	6.13e-05	2.81726
AMIGO1	-1.00432	-0.0918612	-7.058	6.71e-09	1.05e-07	10.1437
AMOT	-1.1045	-0.156527	-7.25464	3.38e-09	6.04e-08	10.8191
AMPD3	1.0396	-0.314394	5.87987	4.1e-07	3.46e-06	6.09922
AMY1C	-1.1136	-0.214644	-3.55105	0.000885118	0.00260611	-1.3326
ANKRD25	-1.08355	0.237799	-8.85013	1.43e-11	6.67e-10	16.2135
ANKRD35	-1.44481	-0.295763	-5.49748	1.54e-06	1.06e-05	4.80292
ANLN	1.94412	-0.491877	9.88937	4.63e-13	4.49e-11	19.5955
ANXA3	1.34511	-0.497675	3.60115	0.000761634	0.00228139	-1.19031
AOC3	-1.83909	-0.357683	-7.83023	4.6e-10	1.15e-08	12.7865
APOBEC3B	1.2057	-0.356727	4.71421	2.2e-05	0.000105058	2.2138
APOC1	1.77287	-1.02953	3.86429	0.000340789	0.00112488	-0.425329
AQP1	-1.0079	-0.0373169	-8.00211	2.54e-10	7.07e-09	13.3701
AR	-2.46438	0.0313876	-7.79901	5.12e-10	1.25e-08	12.6803
ARC	-1.22433	0.0951446	-9.67179	9.38e-13	7.75e-11	18.898
ARHGDIG	-1.20283	-0.0940721	-8.1244	1.67e-10	5.03e-09	13.7841
ARMCX1	-1.16228	-0.107814	-6.11822	1.79e-07	1.71e-06	6.91361
ARSI	-1.03582	0.213329	-7.69143	7.42e-10	1.69e-08	12.3137
ART4	-1.01625	-0.284019	-3.22567	0.00229088	0.00595699	-2.22757
ASCL1	-1.07412	0.157433	-10.8738	2.03e-14	3.85e-12	22.6761
ASPA	-1.29186	0.0118554	-14.2503	1.13e-18	2.14e-15	32.2583
ASPM	1.45742	-0.283562	10.0773	2.52e-13	2.85e-11	20.1933
ATOH8	-1.06996	0.082264	-8.74976	2e-11	8.68e-10	15.8806
ATP1A2	-1.62663	0.233272	-12.2841	2.84e-16	1.62e-13	26.8645
ATP1B2	-1.53898	0.133282	-14.578	4.73e-19	1.11e-15	33.1082
ATP2A1	-1.24144	-0.0213705	-6.85012	1.39e-08	1.94e-07	9.42877
ATP2B2	-1.27426	-0.32765	-6.23146	1.2e-07	1.22e-06	7.30174
ATP6V1C2	-1.28012	-0.26613	-6.32702	8.63e-08	9.27e-07	7.6297
ATP8A2	-1.04747	-0.310434	-6.25412	1.11e-07	1.15e-06	7.37947
AVPR1A	-1.16109	-0.172393	-8.78362	1.78e-11	8.02e-10	15.993
B2M	1.20291	-0.322538	6.47861	5.08e-08	5.87e-07	8.15063
B3GNT3	1.15337	-0.514133	3.47722	0.00110249	0.0031487	-1.54015
BAAT	-1.05437	-0.133178	-7.35933	2.35e-09	4.45e-08	11.1781
BAG2	-1.06027	-0.0633692	-4.66062	2.63e-05	0.000122826	2.04118
BATF	1.29615	-0.369769	5.83017	4.87e-07	4.01e-06	5.92991
BCHE	-1.32546	0.146926	-11.4642	3.29e-15	1.03e-12	24.4622
BCL2L12	1.07319	-0.0869973	7.86804	4.04e-10	1.03e-08	12.9151
BCL3	1.22847	-0.387219	5.40548	2.11e-06	1.39e-05	4.49353
BICC1	-1.29542	-0.0491578	-12.848	5.55e-17	4.18e-14	28.464
BIRC3	1.08483	-0.773999	2.86132	0.00628044	0.0142738	-3.16349
BIRC5	1.99137	-0.463377	8.89432	1.23e-11	5.94e-10	16.3598
BLM	1.3728	-0.320678	10.4049	8.85e-14	1.21e-11	21.2245
BMP6	-1.02378	-0.269262	-7.22294	3.77e-09	6.6e-08	10.7103
BNC1	1.03746	-0.640016	3.21108	0.00238812	0.00616448	-2.26644
BPNT1	1.28191	-0.261958	9.18264	4.7e-12	2.7e-10	17.3091
BRCC2	-1.20121	0.0443181	-10.3979	9.05e-14	1.23e-11	21.2025
BRRN1	1.28189	-0.207262	9.21724	4.19e-12	2.45e-10	17.4224
BST2	1.06915	-0.091863	6.12278	1.76e-07	1.68e-06	6.92923
BTD	-1.1607	-0.211911	-7.79323	5.22e-10	1.27e-08	12.6606
BUB1	1.23132	-0.224216	9.20407	4.38e-12	2.55e-10	17.3793
C10orf116	-1.33507	-0.105387	-4.30365	8.46e-05	0.000336113	0.910817
C10orf39	-1.02604	-0.265511	-7.7261	6.59e-10	1.53e-08	12.4319
C10orf65	-1.169	-0.116416	-7.57372	1.12e-09	2.37e-08	11.9119
C11orf60	-1.09349	-0.0641222	-6.87616	1.27e-08	1.79e-07	9.51837
C12orf5	1.14797	-0.261831	7.95861	2.95e-10	8.06e-09	13.2226
C12orf54	1.15224	-0.644804	3.3449	0.00162516	0.00441587	-1.90565
C13orf21	-1.37669	-0.0595586	-8.56033	3.79e-11	1.47e-09	15.2493
C13orf26	-1.21225	-0.188214	-7.02979	7.4e-09	1.14e-07	10.0467
C13orf3	1.49608	-0.320631	8.54395	4.01e-11	1.53e-09	15.1946
C14orf132	-1.39445	0.202983	-10.6926	3.57e-14	5.9e-12	22.1186
C14orf21	-1.03441	-0.046974	-9.43653	2.03e-12	1.4e-10	18.1373
C14orf37	-1.0389	-0.00368464	-9.76544	6.92e-13	6.09e-11	19.1989
C15orf23	1.31539	-0.388873	7.66937	8.01e-10	1.8e-08	12.2385
C15orf32	-1.07019	-0.0721705	-6.97027	9.11e-09	1.36e-07	9.84206
C15orf33	-1.32701	-0.170374	-7.07112	6.41e-09	1.02e-07	10.1888
C15orf34	-1.2355	-0.138678	-7.7693	5.67e-10	1.36e-08	12.5791
C16orf30	-1.01963	-0.157453	-4.91885	1.11e-05	5.8e-05	2.87905
C16orf45	-1.08712	-0.153828	-6.26812	1.06e-07	1.1e-06	7.42752
C17orf38	-1.04615	-0.0706731	-7.81559	4.84e-10	1.19e-08	12.7367
C17orf64	-1.09255	-0.39401	-5.01077	8.13e-06	4.45e-05	3.18077
C17orf66	1.01149	-0.469498	5.20906	4.14e-06	2.49e-05	3.83704
C19orf40	1.09021	-0.00399205	7.87404	3.95e-10	1.01e-08	12.9355
C1orf112	1.17712	-0.240765	8.30656	8.98e-11	2.98e-09	14.3984
C1orf172	1.09814	-0.0756445	8.45074	5.5e-11	2e-09	14.8826
C1orf59	1.07956	-0.263716	6.14937	1.6e-07	1.56e-06	7.02033
C1QB	1.12358	-0.421396	3.53466	0.000929494	0.00271977	-1.37887
C1QL2	-1.17108	-0.204586	-7.82612	4.66e-10	1.16e-08	12.7725
C1QTNF7	-1.45177	-0.0291932	-18.505	3.32e-23	3.13e-19	42.308
C20orf161	-1.03515	0.0299056	-11.5424	2.6e-15	8.58e-13	24.6952
C20orf172	1.18838	-0.0947273	7.99874	2.57e-10	7.13e-09	13.3587
C20orf175	-1.10215	0.0110946	-11.0176	1.3e-14	2.87e-12	23.1154
C20orf185	-1.22774	-0.350767	-9.38072	2.44e-12	1.6e-10	17.9559
C20orf24	1.09731	-0.34462	6.13462	1.69e-07	1.63e-06	6.96979
C20orf55	1.57393	-0.281062	8.41311	6.25e-11	2.22e-09	14.7564
C20orf56	-1.17597	-0.231652	-6.35063	7.94e-08	8.64e-07	7.71081
C20orf85	-1.06039	-0.0150226	-7.76126	5.83e-10	1.39e-08	12.5518
C21orf13	-1.04773	-0.0668313	-5.94894	3.22e-07	2.82e-06	6.33481
C21orf2	-1.1482	-0.12448	-9.31987	2.98e-12	1.88e-10	17.7577
C21orf34	-1.28694	0.105353	-7.50809	1.4e-09	2.85e-08	11.6875
C21orf55	-1.13775	0.0205565	-6.62598	3.03e-08	3.77e-07	8.65752
C21orf74	-1.33697	-0.030244	-8.00333	2.53e-10	7.05e-09	13.3743
C22orf24	-1.29174	-0.0854529	-6.6392	2.9e-08	3.62e-07	8.70301
C22orf35	1.621	-0.437694	5.672	8.43e-07	6.38e-06	5.39267
C2orf32	-1.14581	0.0824949	-8.12939	1.64e-10	4.96e-09	13.8009
C3orf18	-1.16482	-0.0645746	-9.70602	8.39e-13	7.22e-11	19.0081
C3orf36	-1.1734	0.0242253	-5.52719	1.39e-06	9.73e-06	4.90305
C3orf41	-1.32417	-0.0985286	-9.45663	1.9e-12	1.33e-10	18.2025
C3orf49	-1.14588	-0.111625	-6.25222	1.12e-07	1.15e-06	7.37295
C4orf22	-1.08179	0.0382943	-7.50294	1.43e-09	2.9e-08	11.6699
C4orf7	1.88564	-1.32511	3.50401	0.00101829	0.00294213	-1.46513
C6orf103	-1.01992	-0.33545	-5.09271	6.16e-06	3.51e-05	3.45112
C6orf117	-1.07035	-0.30507	-5.63977	9.43e-07	7e-06	5.28348
C6orf134	-1.01112	-0.18145	-8.4816	4.95e-11	1.84e-09	14.986
C6orf150	1.55811	-0.169766	10.0445	2.8e-13	3.09e-11	20.0891
C6orf154	-1.01814	-0.0143646	-7.35563	2.38e-09	4.51e-08	11.1655
C6orf173	1.41634	-0.631602	4.45434	5.18e-05	0.000221022	1.38366
C6orf189	-1.06408	0.0721537	-7.11883	5.42e-09	8.9e-08	10.3528
C6orf21	-1.35269	-0.112743	-7.9435	3.11e-10	8.38e-09	13.1714
C6orf54	-1.18916	-0.354458	-7.51583	1.36e-09	2.79e-08	11.714
C6orf65	-1.01968	-0.480607	-5.61978	1.01e-06	7.42e-06	5.21583
C7orf9	1.13584	-0.444735	5.95474	3.16e-07	2.77e-06	6.35462
C8orf22	-1.34292	-0.177381	-7.36107	2.33e-09	4.44e-08	11.1841
C9orf138	-1.05079	-0.103366	-6.78598	1.73e-08	2.36e-07	9.20806
C9orf41	1.17502	-0.282683	6.30148	9.43e-08	9.97e-07	7.542
C9orf65	-1.20287	0.174798	-9.08344	6.54e-12	3.47e-10	16.9835
C9orf75	-1.02768	-0.0596693	-6.52814	4.27e-08	5.02e-07	8.32093
CA2	2.02156	-0.565272	6.51997	4.39e-08	5.14e-07	8.29283
CA3	-1.15157	-0.317878	-5.61741	1.02e-06	7.47e-06	5.20781
CADPS	-1.3473	-0.105075	-12.9974	3.62e-17	3.1e-14	28.8806
CAPN11	-1.41449	0.015989	-8.76366	1.91e-11	8.46e-10	15.9267
CAPN3	-1.04687	-0.0134009	-6.46591	5.31e-08	6.11e-07	8.10695
CBLN2	-1.25541	-0.158273	-7.12811	5.25e-09	8.66e-08	10.3846
CBX3	1.05889	-0.223406	7.91835	3.39e-10	8.96e-09	13.086
CBX7	-1.06543	-0.033195	-6.16736	1.51e-07	1.48e-06	7.08195
CCDC42	-1.01975	-0.110356	-6.07546	2.08e-07	1.94e-06	6.76724
CCDC65	-1.04382	-0.241415	-5.6228	1e-06	7.35e-06	5.22606
CCDC74B	-1.11975	-0.395674	-3.39843	0.00139027	0.00385888	-1.75881
CCDC8	-1.13444	0.072461	-6.60489	3.27e-08	4.01e-07	8.58496
CCDC80	-1.11324	0.0950949	-5.66888	8.53e-07	6.43e-06	5.3821
CCDC81	-1.10229	-0.412444	-5.01798	7.93e-06	4.35e-05	3.2045
CCL18	1.26291	-0.822171	2.97852	0.00457228	0.0108265	-2.87065
CCL19	1.11954	-0.87619	2.77293	0.00794238	0.0174632	-3.37888
CCL23	-1.10487	-0.0410841	-9.25067	3.75e-12	2.26e-10	17.5317
CCL25	-1.09812	-0.0210633	-10.2564	1.42e-13	1.79e-11	20.7589
CCL3	1.07774	-0.487593	3.22245	0.00231199	0.00600315	-2.23615
CCNB1	1.63411	-0.449153	7.75962	5.87e-10	1.4e-08	12.5462
CCNE1	1.30527	-0.40189	7.85543	4.21e-10	1.07e-08	12.8722
CCR7	1.59113	-0.563363	5.31095	2.92e-06	1.85e-05	4.17686
CD19	1.09521	-0.551066	5.61432	1.03e-06	7.54e-06	5.19737
CD247	1.06516	-0.440382	4.37757	6.66e-05	0.000273342	1.14192
CD248	-1.19294	0.0479325	-5.47812	1.65e-06	1.13e-05	4.73772
CD34	-1.31247	-0.200687	-11.3922	4.1e-15	1.14e-12	24.247
CD53	1.19067	-0.352417	4.23211	0.000106583	0.000410494	0.68877
CD79B	-1.30792	-0.121577	-7.14274	4.99e-09	8.3e-08	10.4349
CD96	1.12647	-0.282461	5.23207	3.83e-06	2.33e-05	3.91365
CDC2	2.04261	-0.14086	10.1701	1.87e-13	2.25e-11	20.4867
CDC45L	1.55505	-0.277047	9.30669	3.12e-12	1.93e-10	17.7147
CDC6	1.67282	-0.338895	8.85495	1.4e-11	6.59e-10	16.2295
CDC7	1.03511	-0.138582	7.52845	1.31e-09	2.69e-08	11.7572
CDCA1	1.73065	-0.271799	9.45258	1.93e-12	1.34e-10	18.1894
CDCA2	1.12585	-0.245942	9.3511	2.69e-12	1.74e-10	17.8594
CDCA5	1.02871	-0.285555	5.17021	4.73e-06	2.79e-05	3.70794
CDCA8	1.68899	-0.239961	10.3213	1.15e-13	1.52e-11	20.9627
CDH13	-1.12816	-0.390969	-3.79081	0.000427648	0.00137612	-0.641836
CDH18	-1.00048	-0.0471955	-9.14409	5.34e-12	2.98e-10	17.1827
CDH2	-1.05714	-0.285959	-6.57332	3.65e-08	4.4e-07	8.47634
CDH3	1.80729	-0.50538	8.04646	2.19e-10	6.25e-09	13.5204
CDH5	-1.01899	0.066414	-8.28566	9.64e-11	3.15e-09	14.328
CDH7	-1.12317	-0.179943	-7.57467	1.11e-09	2.37e-08	11.9152
CDK5R1	-1.19075	0.0909062	-7.94659	3.08e-10	8.3e-09	13.1818
CDKN2A	3.14733	-0.52714	16.4562	3.98e-21	1.88e-17	37.7266
CDKN2D	1.22093	-0.393892	6.2422	1.16e-07	1.19e-06	7.33856
CDKN3	1.57487	-0.246162	7.70982	6.97e-10	1.6e-08	12.3765
CDR1	-1.8696	0.0417322	-13.5448	7.79e-18	1.13e-14	30.3814
CDT1	1.6917	-0.266624	11.5827	2.3e-15	7.73e-13	24.8153
CDX4	-1.14724	0.0583931	-7.97186	2.82e-10	7.75e-09	13.2676
CENPA	1.63073	-0.297203	6.65375	2.75e-08	3.47e-07	8.75305
CENPF	1.53899	-0.183373	9.34798	2.72e-12	1.75e-10	17.8493
CENPK	1.52894	-0.296377	9.87229	4.89e-13	4.58e-11	19.541
CENPN	1.51716	-0.309676	8.6186	3.11e-11	1.26e-09	15.4439
CEP55	1.67859	-0.267964	10.7756	2.75e-14	4.93e-12	22.3746
CESK1	-1.2574	-0.448965	-6.25679	1.1e-07	1.14e-06	7.38865
CFC1	-1.03822	-0.0651979	-9.87563	4.84e-13	4.57e-11	19.5516
CFD	-2.27247	-0.222082	-6.61406	3.16e-08	3.9e-07	8.61651
CFHR4	-1.04413	-0.167816	-6.31213	9.09e-08	9.68e-07	7.57859
CGNL1	-1.71358	0.257386	-13.3204	1.46e-17	1.68e-14	29.771
CHAF1A	1.24779	-0.316099	7.70319	7.13e-10	1.64e-08	12.3538
CHAF1B	1.59561	-0.323307	9.54212	1.43e-12	1.08e-10	18.4795
CHEK1	1.13332	-0.231256	6.26384	1.08e-07	1.12e-06	7.41284
CHIT1	-1.16315	-0.269304	-3.74873	0.000486608	0.00154139	-0.764821
CHRDL2	-1.07413	-0.526184	-3.21071	0.00239061	0.00617008	-2.26742
CHRNA9	-1.185	-0.472803	-5.20914	4.14e-06	2.49e-05	3.83731
CHRNE	-1.02174	-0.146744	-9.87484	4.85e-13	4.57e-11	19.5491
CHST11	1.19062	-0.0667973	6.31502	9e-08	9.61e-07	7.58851
CILP	-1.83787	-0.0319577	-6.44709	5.67e-08	6.47e-07	8.04225
CKS1B	1.1438	-0.270953	6.08451	2.01e-07	1.89e-06	6.79821
CKS2	1.65425	-0.459172	7.55113	1.21e-09	2.53e-08	11.8347
CLDN1	1.45964	-0.743706	3.7168	0.000536505	0.00167912	-0.85768
CLDN2	-1.02841	0.083113	-7.05808	6.7e-09	1.05e-07	10.144
CLDN5	-1.26039	0.00202151	-9.73907	7.54e-13	6.57e-11	19.1143
CLDN7	1.04868	0.00394591	4.77254	1.81e-05	8.87e-05	2.40246
CLEC1A	-1.46614	-0.322118	-6.95026	9.77e-09	1.44e-07	9.77326
CLEC2B	1.07619	-0.527893	3.64163	0.000674117	0.00205021	-1.07456
CLEC3B	-1.76535	-0.128412	-8.1057	1.78e-10	5.33e-09	13.7208
CLIC3	-1.28438	-0.442245	-4.16609	0.000131697	0.000492519	0.48533
CLIC5	-1.00236	0.00189649	-7.66402	8.16e-10	1.83e-08	12.2202
CLU	-1.32557	0.137958	-4.44453	5.35e-05	0.000226896	1.35266
CNN1	-2.43969	-0.323075	-6.18109	1.44e-07	1.42e-06	7.12903
CNNM1	-1.28179	-0.384379	-6.13203	1.7e-07	1.64e-06	6.96091
CNTN6	-1.10697	-0.0392474	-6.87725	1.26e-08	1.79e-07	9.5221
COL10A1	1.09921	-0.248475	5.12564	5.5e-06	3.18e-05	3.56012
COL14A1	-1.48336	0.0717297	-13.3252	1.44e-17	1.68e-14	29.784
COL1A2	-1.12914	-0.0315782	-4.46951	4.93e-05	0.000211609	1.43162
COL21A1	-1.57246	0.0374224	-8.6338	2.96e-11	1.21e-09	15.4946
COL6A2	-1.24758	0.127296	-5.91147	3.67e-07	3.16e-06	6.20697
COL8A1	1.20295	-0.317067	4.1515	0.00013798	0.000512756	0.440561
COLEC12	-1.63696	-0.239783	-6.57021	3.69e-08	4.43e-07	8.46563
COTL1	1.13052	-0.269103	6.75949	1.9e-08	2.55e-07	9.1169
COX4I2	-1.19216	0.124829	-9.66138	9.71e-13	7.95e-11	18.8645
COX7A1	-1.57691	-0.196911	-7.77163	5.63e-10	1.35e-08	12.5871
CPB1	-1.07377	-0.0458817	-5.93	3.44e-07	2.99e-06	6.27017
CPO	-1.21033	0.0151435	-9.69265	8.77e-13	7.37e-11	18.9651
CPSF3	1.02529	-0.335165	7.1516	4.84e-09	8.08e-08	10.4653
CPXM2	-1.30873	0.0247601	-10.0604	2.66e-13	2.97e-11	20.1397
CR1L	-1.45283	-0.249763	-7.63383	9.06e-10	2e-08	12.1172
CREB3L2	1.28004	-0.276491	6.10183	1.89e-07	1.79e-06	6.85749
CRISP3	-1.41431	-0.177416	-8.72052	2.21e-11	9.45e-10	15.7833
CRNN	-2.70056	-0.657999	-5.24262	3.69e-06	2.26e-05	3.94881
CRYAB	-1.31581	-0.239511	-5.15766	4.94e-06	2.89e-05	3.66626
CRYBA2	-1.07419	0.0824674	-8.7178	2.23e-11	9.5e-10	15.7743
CRYBB1	-1.32745	-0.157951	-9.38236	2.43e-12	1.6e-10	17.9612
CRYGS	-1.0119	-0.010062	-7.90925	3.5e-10	9.15e-09	13.0551
CSAG1	1.13889	-0.377805	3.49009	0.00106123	0.00304471	-1.50414
CSN1S1	-1.11694	-0.198683	-11.4549	3.39e-15	1.04e-12	24.4345
CTAG1A	1.22469	-0.492101	4.88768	1.23e-05	6.36e-05	2.77713
CTGF	-1.15961	-0.121748	-4.72678	2.11e-05	0.000101211	2.2544
CTSK	-1.19729	-0.03748	-4.67795	2.48e-05	0.000116682	2.09693
CTSS	1.42761	-0.368723	6.11924	1.78e-07	1.7e-06	6.91712
CTSZ	1.22242	0.34346	4.00742	0.000217863	0.00076	0.00244086
CXCL1	1.47048	-1.21973	2.59212	0.012674	0.0261544	-3.80418
CXCL10	1.91356	-0.554087	5.2487	3.62e-06	2.22e-05	3.96908
CXCL11	1.82457	-0.515065	4.1831	0.000124726	0.000469337	0.537598
CXCL12	-1.16507	-0.0434282	-5.70711	7.47e-07	5.77e-06	5.51172
CXCL13	1.13729	-0.198011	2.72336	0.00904382	0.0195856	-3.49755
CXCL14	-1.89547	-0.224117	-4.4324	5.57e-05	0.000234279	1.31438
CXCL9	3.01234	-1.13518	5.89122	3.94e-07	3.34e-06	6.13789
CXorf2	-1.36524	-0.337766	-7.20898	3.96e-09	6.87e-08	10.6624
CXorf39	1.12673	-0.3589	7.33876	2.52e-09	4.73e-08	11.1076
CXorf43	-1.42751	-0.176588	-7.62478	9.35e-10	2.05e-08	12.0863
CXorf48	-1.13831	-0.425587	-5.04022	7.36e-06	4.08e-05	3.27779
CYBRD1	-1.10949	-0.0292568	-7.82825	4.63e-10	1.16e-08	12.7798
CYP1A1	-1.14451	-0.0637591	-8.78753	1.76e-11	7.96e-10	16.006
CYP1B1	-1.53383	-0.17839	-5.03784	7.41e-06	4.11e-05	3.26993
CYP2C9	-1.2765	-0.197012	-6.13239	1.7e-07	1.64e-06	6.96215
CYP46A1	-1.11842	0.175757	-9.27581	3.45e-12	2.09e-10	17.6138
CYR61	-1.55463	0.299585	-4.8721	1.3e-05	6.65e-05	2.72625
DACH1	-1.54265	0.0347953	-7.77223	5.62e-10	1.35e-08	12.5891
DBF4	1.19728	-0.326588	9.62544	1.09e-12	8.79e-11	18.7486
DBNDD1	-1.07377	-0.109754	-7.10468	5.7e-09	9.24e-08	10.3042
DCAMKL1	-1.19718	-0.147221	-16.083	9.97e-21	3.76e-17	36.8421
DCN	-1.63721	0.0109402	-5.9673	3.03e-07	2.67e-06	6.39751
DDIT4	1.11071	-0.229032	5.63289	9.66e-07	7.14e-06	5.26019
DDIT4L	-1.50521	0.0393117	-8.31934	8.59e-11	2.88e-09	14.4413
DDX39	1.02296	-0.243807	8.86728	1.35e-11	6.38e-10	16.2704
DDX58	1.00671	-0.466123	4.05003	0.000190459	0.00067617	0.131246
DENND1C	1.16293	-0.332005	8.65719	2.73e-11	1.14e-09	15.5725
DENND2A	-1.14571	-0.0122959	-11.0135	1.31e-14	2.87e-12	23.1031
DERL1	1.03238	-0.273371	9.36789	2.54e-12	1.66e-10	17.9141
DES	-2.01395	0.0195395	-6.35647	7.78e-08	8.5e-07	7.73086
DIO3	-1.43621	0.116661	-6.91352	1.11e-08	1.6e-07	9.64689
DIO3OS	-1.06575	-0.0316935	-13.2288	1.88e-17	1.87e-14	29.5199
DIXDC1	-1.1372	-0.0651477	-8.93953	1.06e-11	5.2e-10	16.5093
DKFZP434B061	-1.02701	-0.279113	-5.44728	1.83e-06	1.24e-05	4.63396
DKFZp547K054	-1.27386	0.179234	-8.30262	9.1e-11	3.01e-09	14.3851
DKFZp586C0721	-1.86892	0.207925	-8.56591	3.72e-11	1.45e-09	15.268
DKFZP586H2123	-1.5784	-0.0150781	-8.07621	1.97e-10	5.78e-09	13.6211
DKFZp686I1569	-1.1911	0.0528165	-9.15632	5.13e-12	2.88e-10	17.2228
DKK1	-1.11459	-0.403721	-2.6835	0.01003	0.0213942	-3.59186
DKK3	-1.02122	-0.137052	-5.10357	5.93e-06	3.39e-05	3.48703
DKK4	-1.0042	-0.178512	-5.21776	4.02e-06	2.43e-05	3.866
DLG7	1.57857	-0.397418	8.9894	8.95e-12	4.5e-10	16.6739
DLGAP2	-1.14747	-0.105724	-5.55033	1.28e-06	9.09e-06	4.98112
DLL4	-1.09485	-0.305528	-6.04005	2.35e-07	2.14e-06	6.64611
DMBX1	-1.06662	-0.0944655	-5.9657	3.04e-07	2.69e-06	6.39204
DNAH1	-1.05308	-0.102048	-10.1385	2.07e-13	2.41e-11	20.3869
DNAH14	-1.13773	-0.0968284	-9.13342	5.53e-12	3.05e-10	17.1477
DNAJC9	1.26156	-0.207851	9.69214	8.78e-13	7.37e-11	18.9634
DNALI1	-1.1038	0.0563079	-7.51213	1.38e-09	2.82e-08	11.7013
DOC1	-1.29314	-0.144896	-6.04665	2.29e-07	2.11e-06	6.66868
DONSON	1.2958	-0.317998	8.2854	9.65e-11	3.15e-09	14.3271
DPEP1	-1.33787	-0.0658464	-8.21611	1.22e-10	3.88e-09	14.0937
DPT	-1.47134	-0.0959389	-10.3104	1.2e-13	1.56e-11	20.9284
DPYSL4	-1.3224	-0.194779	-7.3991	2.04e-09	3.95e-08	11.3144
DSCR1L1	-1.5584	0.16404	-9.38993	2.37e-12	1.58e-10	17.9858
DSCR8	-1.23969	-0.0712428	-7.27745	3.12e-09	5.64e-08	10.8974
DSPP	-1.07583	-0.203621	-5.61288	1.03e-06	7.57e-06	5.1925
DTL	1.10591	-0.0871135	7.24989	3.44e-09	6.11e-08	10.8028
E2F1	1.16565	-0.286267	7.55896	1.17e-09	2.47e-08	11.8615
E2F3	1.07796	-0.251185	9.29181	3.27e-12	2.01e-10	17.6661
E2F7	2.0315	-0.322004	9.98313	3.42e-13	3.56e-11	19.8943
EBF	-1.3003	-0.0887291	-9.60018	1.19e-12	9.27e-11	18.6671
EBP	1.18308	-0.32808	6.48781	4.92e-08	5.71e-07	8.18226
ECGF1	2.07211	-0.349582	9.76972	6.82e-13	6.03e-11	19.2126
ECRG4	-1.93518	-0.171006	-8.36557	7.34e-11	2.54e-09	14.5968
ECSM2	-1.09932	-0.0167625	-9.51144	1.59e-12	1.18e-10	18.3802
ECT2	1.09711	-0.229084	6.78963	1.71e-08	2.34e-07	9.22063
EDARADD	1.0683	-0.121735	6.69743	2.36e-08	3.06e-07	8.90336
EDG1	-1.14075	-0.233953	-6.45314	5.55e-08	6.36e-07	8.06304
EDG2	-1.05648	-0.119739	-8.69978	2.37e-11	1e-09	15.7144
EDN2	2.42775	-1.09803	5.51761	1.44e-06	1e-05	4.87077
EDN3	-1.85177	-0.680429	-5.7066	7.48e-07	5.78e-06	5.50998
EDNRA	-1.61416	-0.168	-11.4392	3.55e-15	1.06e-12	24.3876
EFHA2	-1.28825	0.00449352	-9.15783	5.1e-12	2.88e-10	17.2277
EFHD2	1.05216	-0.191919	5.95789	3.13e-07	2.75e-06	6.36536
EFNA1	1.3263	-0.318443	6.88035	1.25e-08	1.77e-07	9.53275
EGFL7	-1.01827	0.108086	-10.23	1.55e-13	1.92e-11	20.6756
EGLN3	1.41956	-0.596686	3.71199	0.00054443	0.00169828	-0.871621
ELA1	-1.05723	-0.0300202	-8.89173	1.24e-11	5.98e-10	16.3513
ELF3	1.42787	-0.23898	4.82903	1.5e-05	7.53e-05	2.58591
EMCN	-1.48444	0.0969977	-9.78463	6.5e-13	5.77e-11	19.2604
EMR1	1.39168	-0.333593	5.86167	4.37e-07	3.65e-06	6.03719
EMX2	-2.2651	0.0590886	-8.47991	4.98e-11	1.85e-09	14.9803
EMX2OS	-2.44762	-0.0327455	-8.49162	4.78e-11	1.79e-09	15.0195
ENO1	1.13957	-0.070151	6.96527	9.27e-09	1.38e-07	9.82489
ENO1B	1.42328	0.100556	7.02517	7.52e-09	1.16e-07	10.0309
ENPP1	-1.56213	0.366621	-12.0981	4.92e-16	2.38e-13	26.3276
EPHB6	-1.02362	-0.0233079	-7.72766	6.55e-10	1.53e-08	12.4373
EPS8	-1.2371	0.380667	-4.53273	4.01e-05	0.000176872	1.63218
EPSTI1	1.09452	-0.220671	4.56259	3.63e-05	0.000162401	1.72729
EPX	-1.43455	-0.417578	-7.05888	6.69e-09	1.05e-07	10.1467
ESR2	-1.11709	0.0175612	-8.17828	1.39e-10	4.35e-09	13.966
ETV7	1.04069	-0.0293025	5.00632	8.25e-06	4.5e-05	3.16614
EVC2	-1.14593	-0.274295	-7.3762	2.21e-09	4.24e-08	11.236
EXO1	1.26134	-0.214076	9.02442	7.96e-12	4.06e-10	16.7893
EYA1	-1.44132	-0.0253066	-11.3688	4.4e-15	1.18e-12	24.1767
EZH2	1.31909	-0.425859	10.0251	2.98e-13	3.23e-11	20.0276
F10	-1.13436	0.291378	-10.0129	3.1e-13	3.34e-11	19.9889
F11R	1.36536	-0.21151	7.39415	2.08e-09	4.02e-08	11.2975
FAM100B	1.34094	-0.332528	7.58555	1.07e-09	2.29e-08	11.9523
FAM107A	-1.12852	0.0416422	-11.6497	1.88e-15	6.8e-13	25.0137
FAM19A5	-1.1068	0.0513743	-7.71314	6.89e-10	1.59e-08	12.3878
FAM24A	1.34514	-0.632619	4.81552	1.57e-05	7.83e-05	2.54198
FAM27L	-1.0395	-0.109445	-9.37189	2.51e-12	1.64e-10	17.9271
FAM49B	1.35397	-0.534981	9.92306	4.15e-13	4.18e-11	19.703
FAM64A	1.36545	-0.360589	6.52832	4.27e-08	5.02e-07	8.32154
FAM79B	-1.44915	-0.368004	-3.17717	0.00262944	0.0067129	-2.35638
FAM81B	-1.01525	-0.265477	-3.85972	0.000345648	0.00113952	-0.438842
FAM83D	1.48066	-0.271751	6.03458	2.39e-07	2.18e-06	6.6274
FANCA	1.14932	-0.168343	8.51157	4.47e-11	1.69e-09	15.0863
FANCE	1.13666	-0.406554	4.39636	6.26e-05	0.00025933	1.20093
FBLN1	-1.11761	0.047517	-8.93115	1.09e-11	5.33e-10	16.4816
FBXL22	-1.2803	0.123906	-8.61707	3.13e-11	1.27e-09	15.4388
FBXL7	-1.00975	0.0812679	-9.79086	6.37e-13	5.69e-11	19.2804
FBXO27	-1.34847	-0.0157159	-8.35659	7.57e-11	2.61e-09	14.5666
FCGBP	-1.48171	-0.815204	-2.93301	0.00517628	0.0120447	-2.98532
FCGR3A	1.68558	-0.571803	4.62818	2.93e-05	0.000134823	1.93706
FCGR3B	1.16957	-0.214775	4.99787	8.49e-06	4.61e-05	3.13833
FEN1	1.02349	-0.0235318	9.90071	4.46e-13	4.4e-11	19.6317
FERD3L	-1.1369	0.0268667	-5.8671	4.29e-07	3.59e-06	6.05568
FGF13	-1.47124	-0.102625	-8.4076	6.36e-11	2.26e-09	14.7379
FGF2	-1.00648	0.0310911	-6.25174	1.12e-07	1.15e-06	7.37131
FGF7	-1.1161	0.00744317	-6.99349	8.4e-09	1.27e-07	9.92192
FGF9	-1.52666	-0.014753	-10.9352	1.67e-14	3.43e-12	22.8642
FHL1	-1.23305	0.177345	-8.39717	6.59e-11	2.33e-09	14.7029
FKBP7	-1.09598	-0.046881	-7.88787	3.77e-10	9.75e-09	12.9824
FLJ10159	-1.35176	0.294824	-11.1067	9.84e-15	2.29e-12	23.3864
FLJ10916	-1.1192	-0.0437954	-5.00489	8.29e-06	4.52e-05	3.16143
FLJ13646	-1.03516	-0.183318	-5.99482	2.75e-07	2.46e-06	6.49151
FLJ14082	-1.05902	-0.0296451	-7.9192	3.38e-10	8.95e-09	13.0889
FLJ14816	-1.1753	-0.0517104	-12.1306	4.47e-16	2.22e-13	26.4216
FLJ20516	1.27005	-0.361939	7.46497	1.63e-09	3.25e-08	11.54
FLJ20701	-1.65591	0.0544539	-9.68785	8.91e-13	7.42e-11	18.9497
FLJ21075	-1.05188	0.0677497	-7.81129	4.91e-10	1.2e-08	12.7221
FLJ21963	-1.27825	-0.223684	-9.15279	5.19e-12	2.9e-10	17.2112
FLJ22655	-1.35489	0.356442	-7.87852	3.89e-10	9.99e-09	12.9507
FLJ22675	-1.09426	-0.427262	-6.7532	1.94e-08	2.59e-07	9.09525
FLJ23577	-1.00642	-0.293974	-7.03461	7.28e-09	1.13e-07	10.0633
FLJ25758	-1.10378	-0.134371	-10.6776	3.74e-14	5.97e-12	22.0722
FLJ31485	-1.27655	0.0736814	-6.71542	2.22e-08	2.89e-07	8.96525
FLJ32011	-1.34747	-0.34489	-6.96468	9.29e-09	1.38e-07	9.82285
FLJ35773	-1.05536	0.0134964	-6.57044	3.68e-08	4.43e-07	8.46645
FLJ38964	-1.15566	-0.328739	-5.88035	4.09e-07	3.45e-06	6.10085
FLJ39501	-1.17297	-0.218704	-9.51482	1.57e-12	1.17e-10	18.3912
FLJ39822	-1.12622	-0.206718	-7.20731	3.98e-09	6.89e-08	10.6567
FLJ40298	-1.26792	-0.239301	-11.3636	4.47e-15	1.19e-12	24.1614
FLJ46154	-1.29081	-0.348278	-8.79618	1.71e-11	7.78e-10	16.0347
FLJ46266	-1.25668	-0.14754	-7.5926	1.05e-09	2.25e-08	11.9764
FLJ90723	-1.14466	0.00411941	-8.24467	1.11e-10	3.54e-09	14.19
FLRT2	-1.14613	-0.04047	-5.83523	4.79e-07	3.96e-06	5.94715
FMOD	-1.25979	-0.171448	-4.73874	2.03e-05	9.78e-05	2.29304
FOXA2	-1.11118	-0.183286	-6.24599	1.14e-07	1.17e-06	7.35159
FOXF1	-1.12691	0.0117228	-12.1364	4.39e-16	2.22e-13	26.4384
FOXL2	-1.22721	0.00951729	-5.64561	9.24e-07	6.88e-06	5.30326
FOXM1	1.05751	-0.22873	7.92678	3.3e-10	8.8e-09	13.1146
FRMPD4	-1.24798	-0.259028	-7.21605	3.87e-09	6.73e-08	10.6866
FRRS1	-1.00224	-0.0848729	-8.11054	1.75e-10	5.25e-09	13.7372
FRZB	-1.03165	-0.127979	-3.9708	0.000244438	0.000841487	-0.10774
FUBP1	1.07581	-0.297626	7.55203	1.2e-09	2.52e-08	11.8378
FUT7	-1.47806	0.00827082	-6.38772	6.98e-08	7.7e-07	7.8382
FXYD1	-1.40784	-0.106254	-6.833	1.47e-08	2.04e-07	9.36985
FXYD3	1.19615	-0.388006	4.5066	4.37e-05	0.0001905	1.54915
FXYD6	-1.13008	0.133515	-10.1662	1.9e-13	2.26e-11	20.4743
FYB	1.00253	-0.29955	4.16352	0.000132786	0.000495998	0.477423
FZD6	1.15558	-0.439555	6.57502	3.63e-08	4.38e-07	8.48218
G0S2	1.33152	-1.01739	2.65177	0.0108845	0.0229416	-3.66621
GABRP	1.41304	-0.646423	3.66241	0.000633003	0.00193957	-1.01483
GADD45G	-1.1166	0.0920233	-8.78633	1.77e-11	7.97e-10	16.002
GAL3ST4	-1.11012	-0.0197403	-15.1146	1.16e-19	3.12e-16	34.4712
GALNT14	1.36063	-0.545426	3.64558	0.000666095	0.00202968	-1.0632
GALNTL1	-1.15205	-0.076616	-8.85838	1.39e-11	6.55e-10	16.2409
GATA1	-1.10002	-0.147373	-7.81485	4.85e-10	1.19e-08	12.7342
GBP1	1.26188	-0.437571	4.02371	0.000206965	0.000727368	0.0515985
GBP4	1.25793	-0.183229	4.38931	6.41e-05	0.00026436	1.17879
GBP5	2.04922	-0.73268	4.51015	4.32e-05	0.000188684	1.56043
GCRG224	-1.08143	0.0281934	-6.06365	2.16e-07	2e-06	6.72682
GDAP1L1	-1.09165	0.06934	-9.6256	1.09e-12	8.79e-11	18.7491
GDF15	1.41369	-1.02123	2.80239	0.00734789	0.0163623	-3.30762
GDPD1	-1.04656	-0.378355	-6.48914	4.89e-08	5.69e-07	8.18683
GDPD4	-1.20208	-0.0139705	-9.13668	5.48e-12	3.03e-10	17.1584
GGH	1.35859	-0.359562	5.66752	8.57e-07	6.46e-06	5.37749
GIF	-1.09208	-0.255855	-10.5918	4.9e-14	7.37e-12	21.8067
GINS2	1.34063	-0.311451	8.6331	2.96e-11	1.21e-09	15.4922
GLDC	1.47197	-0.786921	3.22794	0.0022761	0.00592552	-2.22151
GLI1	-1.28238	0.1125	-8.0047	2.52e-10	7.04e-09	13.3789
GLRA1	-1.08393	-0.337126	-6.28203	1.01e-07	1.06e-06	7.47524
GLRB	-1.18047	-0.157281	-5.36885	2.4e-06	1.56e-05	4.37068
GLT1D1	-1.0332	-0.0432149	-5.08887	6.24e-06	3.55e-05	3.4384
GMNN	1.46381	-0.315243	7.68863	7.5e-10	1.7e-08	12.3042
GMPS	1.21935	-0.357993	5.67516	8.34e-07	6.32e-06	5.40335
GNG11	-1.43908	-0.155849	-6.80944	1.6e-08	2.19e-07	9.2888
GNLY	1.05525	-0.491378	3.2998	0.00185187	0.00495048	-2.02827
GP1BB	-1.12367	-0.0943846	-5.81363	5.16e-07	4.21e-06	5.87364
GPD2	1.11724	-0.311885	9.58302	1.25e-12	9.73e-11	18.6117
GPR109B	1.49102	-0.496833	4.60236	3.19e-05	0.000144931	1.85435
GPR124	-1.26358	0.121377	-12.9111	4.63e-17	3.64e-14	28.6403
GPR141	-1.16605	-0.0210178	-7.81559	4.84e-10	1.19e-08	12.7367
GPR173	-1.03642	-0.163735	-8.73462	2.1e-11	9.05e-10	15.8302
GPR30	-1.25071	-0.128577	-6.52906	4.26e-08	5.02e-07	8.32412
GPR87	1.57573	-0.585037	4.81695	1.56e-05	7.8e-05	2.54663
GPRASP1	-1.46933	0.00469836	-9.22026	4.15e-12	2.44e-10	17.4323
GPRASP2	-1.04852	0.240222	-6.67095	2.59e-08	3.3e-07	8.81223
GRIA2	-1.01663	-0.137517	-8.08554	1.91e-10	5.64e-09	13.6527
GRIP2	-1.03743	-0.0275195	-7.21112	3.93e-09	6.83e-08	10.6697
GRK1	-1.23928	0.00479102	-10.2791	1.32e-13	1.71e-11	20.83
GRP	1.06195	-0.302866	3.01963	0.00408394	0.00982021	-2.76604
GSTP1	1.09681	-0.430552	3.98148	0.000236382	0.000816739	-0.0756683
GUCA1C	-1.08589	-0.135374	-6.57479	3.63e-08	4.38e-07	8.4814
GZMB	1.55921	-0.633174	4.28099	9.11e-05	0.000358758	0.840332
H2AFV	1.14143	-0.406655	9.546	1.42e-12	1.07e-10	18.492
H2AFZ	1.29376	-0.410439	7.68599	7.56e-10	1.71e-08	12.2952
HAND2	-1.37364	0.149651	-9.04239	7.5e-12	3.87e-10	16.8485
HCAP-G	1.21166	-0.242076	7.92067	3.37e-10	8.92e-09	13.0939
HELLS	1.00831	-0.170318	8.41516	6.2e-11	2.21e-09	14.7632
HIG2	1.23452	-0.617472	3.86451	0.000340549	0.00112429	-0.424657
HIGD1B	-1.52903	0.00572542	-8.26976	1.02e-10	3.29e-09	14.2745
HIST1H1C	1.65641	-0.291393	7.1099	5.6e-09	9.1e-08	10.3221
HIST1H1D	1.44403	-0.137155	8.01015	2.48e-10	6.95e-09	13.3974
HIST1H1E	1.42251	-0.0220304	8.64112	2.88e-11	1.19e-09	15.519
HIST1H2AD	1.35737	-0.374117	5.31064	2.93e-06	1.85e-05	4.17582
HIST1H2AE	1.59361	-0.380081	6.0467	2.29e-07	2.11e-06	6.66884
HIST1H2BE	1.04086	-0.237663	5.0384	7.4e-06	4.1e-05	3.27178
HIST1H2BF	1.18117	-0.244138	5.75459	6.34e-07	5e-06	5.6729
HIST1H2BG	1.06339	-0.243377	6.17111	1.49e-07	1.46e-06	7.0948
HIST1H2BH	1.28404	-0.327764	6.23956	1.17e-07	1.19e-06	7.32953
HIST1H2BI	1.10899	-0.18939	6.06167	2.18e-07	2.02e-06	6.72004
HIST1H2BL	1.26	-0.276642	6.00416	2.66e-07	2.39e-06	6.52341
HIST1H2BM	1.10547	-0.237316	5.64716	9.19e-07	6.86e-06	5.3085
HIST1H4J	1.02346	-0.253002	7.54738	1.22e-09	2.56e-08	11.8219
HIST2H2AA3	1.28994	-0.220938	4.5816	3.41e-05	0.000153697	1.78797
HIST3H2A	1.10861	-0.221319	5.14321	5.19e-06	3.02e-05	3.61834
HK2	1.24322	-0.555908	4.60389	3.17e-05	0.000144287	1.85923
HLA-C	1.24723	-0.030418	6.35738	7.76e-08	8.48e-07	7.73399
HLA-F	1.02317	-0.118828	4.44894	5.28e-05	0.000224353	1.36659
HLF	-1.68426	-0.125915	-5.46158	1.74e-06	1.18e-05	4.68206
HLX1	-1.11399	-0.0565739	-5.50827	1.48e-06	1.03e-05	4.83927
HMG4L	1.18882	-0.0483988	4.68857	2.39e-05	0.000113258	2.13114
HMGB2	1.38234	-0.306277	8.05212	2.14e-10	6.14e-09	13.5396
HMGB3	1.32583	-0.394414	4.85133	1.39e-05	7.06e-05	2.65854
HMMR	1.55072	-0.514027	7.64025	8.86e-10	1.97e-08	12.1391
HN1	1.41151	-0.282809	9.57052	1.31e-12	1.01e-10	18.5713
HOP	-1.16652	-0.223096	-4.58998	3.32e-05	0.000149933	1.81475
HOXA11S	-1.16529	-0.0229077	-5.78558	5.69e-07	4.58e-06	5.77824
HOXA13	-1.32819	0.0973045	-6.47276	5.18e-08	5.97e-07	8.13051
HOXD13	-1.11168	-0.031539	-5.82417	4.98e-07	4.09e-06	5.9095
HP	-1.20423	-0.650502	-3.09009	0.00335879	0.00830486	-2.58451
HPCA	-1.05658	0.0813077	-9.83618	5.5e-13	5.08e-11	19.4255
HS6ST2	1.21456	-0.625632	3.69302	0.000576822	0.00178778	-0.926554
HSPA12B	-1.18143	0.0861388	-12.9111	4.63e-17	3.64e-14	28.6403
HSPB2	-1.84419	-0.00279808	-10.4472	7.74e-14	1.07e-11	21.3565
HSPB7	-1.28041	0.134802	-9.1161	5.86e-12	3.18e-10	17.0908
HSPB8	-1.02566	0.0752732	-6.27943	1.02e-07	1.07e-06	7.46633
HSSUCCDH	-1.17549	-0.0728692	-6.26776	1.06e-07	1.1e-06	7.4263
HTN3	-1.37179	-0.210217	-7.75919	5.87e-10	1.4e-08	12.5447
HTR1F	-1.30896	-0.168351	-5.73171	6.86e-07	5.36e-06	5.59521
HTR2C	-1.32996	-0.00482622	-10.925	1.73e-14	3.5e-12	22.8331
HTR6	-1.40642	-0.0331286	-9.04663	7.39e-12	3.83e-10	16.8624
ICAM1	1.98538	-0.288401	8.09732	1.84e-10	5.46e-09	13.6925
ICEBERG	-1.0763	-0.387818	-5.47321	1.68e-06	1.14e-05	4.72121
ID4	-1.34978	0.0461004	-6.06956	2.12e-07	1.97e-06	6.74706
IDH2	1.00968	-0.0380712	4.76011	1.89e-05	9.18e-05	2.3622
IFI16	1.36223	-0.339854	7.60207	1.01e-09	2.19e-08	12.0088
IFI27	1.40628	-0.618614	5.72387	7.05e-07	5.49e-06	5.56857
IFI30	2.12748	-0.484134	8.60072	3.31e-11	1.32e-09	15.3842
IFI44	1.13507	-0.381445	3.4635	0.00114814	0.0032608	-1.57845
IFI44L	1.52724	-0.392093	4.95466	9.82e-06	5.23e-05	2.99641
IFI6	1.45317	-0.65312	5.52861	1.38e-06	9.69e-06	4.90787
IFNA14	-1.05997	-0.189303	-8.06204	2.07e-10	6e-09	13.5731
IFNA21	-1.04232	-0.144274	-6.65671	2.72e-08	3.44e-07	8.76323
IGF1	-1.60042	-0.16993	-6.10518	1.87e-07	1.77e-06	6.86896
IGFBP4	-1.0432	0.205795	-6.04508	2.31e-07	2.11e-06	6.6633
IGFBP5	-1.74636	0.24048	-10.9765	1.47e-14	3.15e-12	22.9901
IGFBP6	-1.454	-0.377262	-3.6512	0.000654878	0.00200009	-1.04708
IGHG1	1.18406	-0.277649	2.92407	0.00530336	0.0123067	-3.00771
IGHM	1.61424	-0.320386	5.31871	2.85e-06	1.81e-05	4.2028
IGKV1-5	1.0344	-0.413151	2.53592	0.014602	0.0295602	-3.93204
IGLV2-14	1.10851	-0.348721	2.85106	0.00645538	0.0146062	-3.18875
IL11	1.09219	-0.218426	4.01001	0.000216096	0.000754533	0.0102422
IL17D	-1.02255	0.114171	-10.255	1.43e-13	1.79e-11	20.7544
IL1F9	1.51473	-1.10818	2.94812	0.00496798	0.0116348	-2.94739
IL21R	1.28874	-0.47785	6.215	1.28e-07	1.28e-06	7.24528
IL23A	1.33224	-0.176567	4.94792	1e-05	5.33e-05	2.97429
IL2RA	1.09628	-0.27988	5.30146	3.02e-06	1.91e-05	4.14516
IL32	1.17128	-0.21169	6.00587	2.65e-07	2.38e-06	6.52925
IL4I1	1.29349	-0.538919	5.19542	4.34e-06	2.59e-05	3.7917
IL6	1.56809	-0.730003	2.78431	0.00770762	0.0170185	-3.35141
IL8	1.91078	-1.06207	3.28549	0.00192985	0.00513564	-2.06695
INDO	2.63091	-0.99608	5.23104	3.84e-06	2.34e-05	3.91022
INHBA	1.50485	-0.421443	4.84992	1.4e-05	7.09e-05	2.65394
INHBB	-1.08765	-0.0650824	-3.68807	0.000585574	0.00181044	-0.940863
INSM2	-1.11205	-0.314662	-9.43044	2.07e-12	1.41e-10	18.1175
IRF6	1.27214	-0.296731	5.70509	7.52e-07	5.81e-06	5.50487
ISG15	1.2645	-0.47962	4.02786	0.00020427	0.000718702	0.0641544
ISG20	1.52535	-0.41617	5.57811	1.17e-06	8.39e-06	5.07493
ISOC1	-1.00271	0.00516029	-6.96962	9.13e-09	1.36e-07	9.83983
ITGA3	1.27359	-0.0673078	5.72796	6.95e-07	5.42e-06	5.58247
ITGA8	-1.26212	0.30763	-6.20732	1.31e-07	1.31e-06	7.21893
ITIH5L	-1.03477	-0.0200108	-10.0829	2.48e-13	2.81e-11	20.211
JAM2	-1.53646	0.0694692	-11.6547	1.85e-15	6.8e-13	25.0285
JMJD2D	-1.53332	-0.491396	-6.78057	1.77e-08	2.4e-07	9.18943
K5B	-1.00154	-0.393819	-2.95809	0.0048348	0.0113551	-2.92228
KAZALD1	-1.25173	-0.0594732	-8.32822	8.34e-11	2.81e-09	14.4712
KCNA5	-1.25038	-0.00492055	-10.6553	4.01e-14	6.35e-12	22.0034
KCNA6	-1.23516	-0.14571	-8.20977	1.25e-10	3.96e-09	14.0723
KCNB1	-1.57653	-0.280274	-9.13425	5.52e-12	3.05e-10	17.1504
KCNB2	-1.2208	-0.0733003	-6.22706	1.22e-07	1.24e-06	7.28665
KCNF1	-1.27908	-0.183143	-10.1243	2.17e-13	2.51e-11	20.3421
KCNIP3	-1.11732	-0.475008	-5.03944	7.37e-06	4.09e-05	3.27522
KCNN1	-1.11803	0.033546	-7.74506	6.17e-10	1.46e-08	12.4966
KCNQ4	-1.29478	-0.0968268	-8.33426	8.17e-11	2.76e-09	14.4915
KCNS2	-1.07323	-0.234688	-7.82833	4.63e-10	1.16e-08	12.7801
KIAA0101	2.15073	-0.416078	9.74448	7.4e-13	6.49e-11	19.1316
KIAA0367	-1.121	0.09404	-9.67727	9.22e-13	7.65e-11	18.9156
KIAA1394	-1.01112	0.0934404	-6.03227	2.41e-07	2.2e-06	6.61949
KIAA1456	-1.47956	-0.121019	-8.07474	1.98e-10	5.79e-09	13.6161
KIAA1467	-1.25041	0.199655	-7.18212	4.35e-09	7.39e-08	10.5702
KIAA1576	-1.17814	-0.40383	-5.16869	4.75e-06	2.8e-05	3.70289
KIAA1661	-1.26712	-0.0226104	-6.88307	1.24e-08	1.75e-07	9.54212
KIAA1683	-1.66969	0.0770034	-10.9639	1.53e-14	3.2e-12	22.9519
KIAA1794	1.78748	-0.36451	11.4518	3.42e-15	1.04e-12	24.4252
KIAA1920	-1.12625	-0.165955	-6.33148	8.49e-08	9.14e-07	7.64502
KIF11	1.31327	-0.212135	9.11598	5.87e-12	3.18e-10	17.0904
KIF15	1.0028	-0.341338	7.91618	3.42e-10	9.01e-09	13.0786
KIF18A	1.06201	-0.147561	8.49733	4.69e-11	1.76e-09	15.0386
KIF2	1.00582	-0.263882	8.0079	2.49e-10	6.98e-09	13.3898
KIF23	1.87447	-0.407124	12.0738	5.29e-16	2.43e-13	26.2569
KIF2C	1.31688	-0.22048	10.6314	4.33e-14	6.68e-12	21.9293
KIF4A	1.05632	-0.0637809	10.8963	1.89e-14	3.7e-12	22.745
KIF5C	-1.03758	-0.336614	-3.77506	0.000448858	0.00143459	-0.687944
KIFC1	1.15355	0.0249519	7.9639	2.9e-10	7.93e-09	13.2406
KIR2DS1	-1.13889	0.0267206	-6.99158	8.46e-09	1.28e-07	9.91535
KLHDC7B	2.194	-0.347728	6.01405	2.57e-07	2.32e-06	6.5572
KLHL17	-1.21375	0.0853337	-9.57965	1.27e-12	9.79e-11	18.6008
KLK12	-2.43469	-1.44374	-3.54114	0.000911698	0.00267601	-1.36059
KLK6	-1.30891	-0.00739717	-9.46884	1.82e-12	1.29e-10	18.2421
KLRC4	1.05985	-0.370976	4.25851	9.79e-05	0.000381499	0.770544
KNG1	-1.06366	-0.089142	-8.05206	2.14e-10	6.14e-09	13.5393
KNTC1	1.09061	-0.119666	8.71191	2.27e-11	9.66e-10	15.7547
KNTC2	1.06865	-0.12209	7.2254	3.74e-09	6.56e-08	10.7188
KPNA2	1.30655	-0.156165	9.06176	7.03e-12	3.68e-10	16.9122
KRT1	-2.17905	-1.571	-3.78891	0.00043015	0.00138254	-0.647393
KRT13	-1.3033	-0.235215	-2.11435	0.0398232	0.0704185	-4.82066
KRT17	1.61173	-0.46194	4.52645	4.09e-05	0.000179888	1.61221
KRT19	1.29332	-0.678606	3.42749	0.00127667	0.00358477	-1.67852
KRT37	-1.08765	-0.114032	-6.89376	1.19e-08	1.7e-07	9.57888
KRT4	-1.95266	-1.26841	-2.98065	0.00454577	0.0107718	-2.86527
KRT7	1.40563	0.0467321	5.68196	8.15e-07	6.2e-06	5.42641
KRT86	1.0203	-0.260907	6.74966	1.97e-08	2.62e-07	9.08308
KRTAP13-1	-1.12425	-0.0889272	-10.7626	2.87e-14	4.95e-12	22.3346
KRTAP13-2	-1.08939	-0.0829574	-7.60309	1.01e-09	2.18e-08	12.0123
KRTAP4-8	-1.20643	-0.150467	-7.48426	1.52e-09	3.06e-08	11.606
KRTAP7-1	-1.1394	-0.186462	-10.3278	1.13e-13	1.5e-11	20.9831
KRTAP9-8	-1.01275	-0.270423	-7.08034	6.2e-09	9.9e-08	10.2205
KRTCAP3	1.39005	-0.347379	6.13976	1.66e-07	1.61e-06	6.98738
KYNU	1.46409	-0.520331	4.55645	3.71e-05	0.000165249	1.70772
LAD1	1.04287	-0.487266	3.53545	0.000927308	0.00271464	-1.37665
LAMB3	1.73276	-0.594858	5.15351	5.01e-06	2.93e-05	3.65252
LAMC2	1.37654	-0.470305	4.45249	5.22e-05	0.000222162	1.37781
LAMP3	1.62259	-0.485139	5.42781	1.96e-06	1.31e-05	4.56854
LAP3	1.24894	-0.418957	4.95764	9.72e-06	5.19e-05	3.00618
LCE3D	-1.84692	-0.793455	-3.88542	0.000319135	0.00106159	-0.36265
LCN12	-1.29709	-0.192116	-10.2268	1.56e-13	1.92e-11	20.6657
LCP1	1.05738	-0.301947	4.12499	0.000150144	0.000552512	0.359421
LCT	-1.13692	-0.044874	-6.88418	1.23e-08	1.75e-07	9.54595
LDHA	1.13061	-0.245839	5.90017	3.82e-07	3.26e-06	6.16842
LEMD1	1.41969	-0.704673	3.73692	0.000504528	0.001592	-0.799232
LENEP	-1.43286	-0.238791	-7.28715	3.02e-09	5.51e-08	10.9307
LGALS1	-1.00684	-0.127955	-3.98793	0.000231641	0.000802861	-0.0562748
LGI4	-1.27185	0.121946	-19.57	3.22e-24	6.07e-20	44.5192
LGR5	-1.14139	-0.161056	-7.32204	2.67e-09	4.96e-08	11.0503
LHFP	-1.00905	-0.157323	-4.60167	3.19e-05	0.000145229	1.85213
LHX5	-1.04174	-0.154771	-6.79939	1.65e-08	2.27e-07	9.25419
LIFR	-1.02141	0.119118	-7.9579	2.96e-10	8.06e-09	13.2202
LIG1	1.11198	-0.101608	7.6721	7.94e-10	1.78e-08	12.2478
LILRA5	-1.00562	-0.0869582	-6.76075	1.89e-08	2.54e-07	9.12123
LILRB3	1.27667	-0.384312	3.87082	0.000333947	0.00110462	-0.405968
LIPF	-1.01665	-0.314525	-5.36469	2.43e-06	1.58e-05	4.35675
LMNB1	1.6276	0.394842	8.05896	2.09e-10	6.04e-09	13.5627
LMNB2	1.13077	-0.322442	6.15372	1.58e-07	1.54e-06	7.03521
LMO3	-1.86441	0.00809663	-9.0104	8.34e-12	4.24e-10	16.7431
LOC136242	-1.03408	0.0926256	-8.07204	2e-10	5.82e-09	13.607
LOC151658	-1.33181	-0.151176	-5.99353	2.76e-07	2.47e-06	6.48708
LOC153364	-1.00494	-0.111733	-5.9163	3.61e-07	3.12e-06	6.22344
LOC158830	1.11869	-0.374854	5.56074	1.24e-06	8.83e-06	5.0163
LOC199899	-1.12569	-0.0950864	-6.31137	9.11e-08	9.7e-07	7.57599
LOC222967	-1.24011	-0.351491	-5.86252	4.36e-07	3.64e-06	6.04009
LOC283824	-1.0423	-0.0132754	-7.91871	3.39e-10	8.96e-09	13.0872
LOC284033	-1.27958	-0.129444	-7.45484	1.68e-09	3.36e-08	11.5053
LOC284112	-1.20275	0.0826339	-17.057	9.36e-22	5.88e-18	39.1171
LOC284242	-1.01206	-0.220213	-8.86719	1.35e-11	6.38e-10	16.2701
LOC284244	-1.0337	0.0774162	-5.46604	1.72e-06	1.17e-05	4.69707
LOC284933	-1.01001	-0.00254747	-8.37914	7.01e-11	2.44e-09	14.6423
LOC285441	-1.04625	-0.283492	-7.1779	4.41e-09	7.47e-08	10.5557
LOC285740	-1.31461	-0.137779	-7.89457	3.68e-10	9.56e-09	13.0052
LOC340073	-1.24016	-0.0545786	-7.55505	1.19e-09	2.5e-08	11.8481
LOC352909	-1.09588	0.163652	-8.27274	1.01e-10	3.26e-09	14.2845
LOC387895	-1.1202	-0.214985	-4.46723	4.97e-05	0.000212999	1.42441
LOC388135	-1.19372	-0.139163	-4.41284	5.94e-05	0.000247888	1.25278
LOC388160	-1.12674	0.141523	-7.04602	6.99e-09	1.09e-07	10.1025
LOC389458	1.07787	-0.11331	5.58034	1.16e-06	8.35e-06	5.08248
LOC390712	1.02068	-0.174191	2.58025	0.0130608	0.0268264	-3.83137
LOC399959	-1.02209	-0.190852	-6.72997	2.11e-08	2.77e-07	9.01533
LOC400456	-1.37124	-0.0523631	-8.20854	1.25e-10	3.97e-09	14.0681
LOC400655	-1.28891	-0.151082	-6.77682	1.79e-08	2.42e-07	9.17655
LOC439913	-1.32638	-0.131646	-8.0533	2.13e-10	6.14e-09	13.5436
LOC439914	-1.00851	-0.287621	-5.80088	5.4e-07	4.38e-06	5.83027
LOC440132	-1.12873	-0.0643706	-10.5899	4.93e-14	7.37e-12	21.8006
LOC440335	1.0096	-0.564348	2.97174	0.00465787	0.0110029	-2.88781
LOC440421	1.19999	-0.342394	3.18516	0.00257064	0.00658152	-2.33526
LOC440607	1.33487	-0.421843	4.39035	6.39e-05	0.000263583	1.18205
LOC440731	1.21963	-0.662352	3.42982	0.00126793	0.00356288	-1.67204
LOC441178	-1.04106	-0.217277	-9.55143	1.39e-12	1.06e-10	18.5096
LOC474358	-1.09817	-0.00860972	-6.6667	2.63e-08	3.35e-07	8.7976
LOC554175	-1.20048	-0.192477	-8.11072	1.75e-10	5.25e-09	13.7378
LOC641518	-1.25515	-0.318319	-9.48487	1.73e-12	1.24e-10	18.2941
LOC642675	-1.0163	-0.17672	-7.32557	2.64e-09	4.93e-08	11.0624
LOC643125	-1.0322	-0.130162	-5.87821	4.12e-07	3.47e-06	6.09357
LOC645904	-1.08611	-0.300529	-4.56989	3.55e-05	0.000158875	1.75059
LOC646486	-1.24202	-0.300732	-5.06601	6.74e-06	3.79e-05	3.36289
LOC652408	-1.32407	0.208187	-9.06012	7.07e-12	3.69e-10	16.9068
LOC652791	1.07236	-0.258688	2.35404	0.022806	0.0435101	-4.33102
LOC91461	-1.29102	0.341232	-6.7551	1.93e-08	2.58e-07	9.1018
LONRF2	-1.62928	0.223598	-6.92538	1.07e-08	1.55e-07	9.68767
LRCH2	-1.44647	-0.095887	-9.4798	1.76e-12	1.26e-10	18.2777
LRFN5	-1.51421	-0.151906	-11.8731	9.6e-16	3.77e-13	25.6716
LRP8	1.08789	-0.229832	7.28973	2.99e-09	5.47e-08	10.9395
LRRC17	-1.17509	0.00479221	-6.29257	9.73e-08	1.03e-06	7.51145
LRRC4C	-1.24679	-0.148161	-7.9634	2.91e-10	7.94e-09	13.2389
LRRC7	-1.15098	0.176426	-7.10579	5.68e-09	9.21e-08	10.308
LRTM2	-1.44599	-0.0971579	-8.56755	3.7e-11	1.45e-09	15.2734
LTB	1.32854	-0.232863	5.2015	4.25e-06	2.55e-05	3.81192
LTBP1	-1.21564	-0.203742	-5.17379	4.67e-06	2.76e-05	3.71982
LTF	-1.1012	-1.01709	-2.31337	0.0251302	0.0473194	-4.41706
LUZP5	1.20739	-0.2809	8.55467	3.86e-11	1.49e-09	15.2304
LUZPP1	-1.30098	-0.101237	-8.23395	1.15e-10	3.67e-09	14.1538
LY6K	1.22614	-0.334284	7.62696	9.28e-10	2.04e-08	12.0938
LYG2	-1.02805	-0.259768	-7.5578	1.18e-09	2.48e-08	11.8575
LYPD2	-1.38076	-0.34046	-8.06458	2.05e-10	5.95e-09	13.5817
LYZ	1.34764	-0.521579	3.47199	0.00111967	0.00318762	-1.55475
MAB21L2	1.01552	-0.530311	2.85401	0.00640459	0.0145139	-3.18149
MAD2L1	1.28138	-0.154216	7.41832	1.91e-09	3.74e-08	11.3803
MAGEH1	-1.06812	-0.105438	-7.92627	3.3e-10	8.8e-09	13.1129
MAGOH	1.05353	0.217831	7.97884	2.76e-10	7.59e-09	13.2913
MAL	-2.1651	-0.334433	-5.61852	1.01e-06	7.44e-06	5.21156
MAS1	-1.23582	-0.311942	-6.18557	1.41e-07	1.4e-06	7.14438
MATN2	-1.00447	0.0684671	-8.62459	3.05e-11	1.24e-09	15.4639
MATN3	-1.36711	-0.189322	-6.6965	2.37e-08	3.06e-07	8.90016
MATN4	-1.04436	0.0634193	-11.9331	8.03e-16	3.43e-13	25.8474
MCM2	1.38466	-0.196323	9.04126	7.52e-12	3.87e-10	16.8447
MCM3	1.29248	-0.394971	7.39096	2.1e-09	4.05e-08	11.2865
MCM4	1.40868	-0.173122	8.87149	1.33e-11	6.32e-10	16.2843
MCM5	1.27041	-0.151684	10.6827	3.68e-14	5.93e-12	22.088
MCM6	1.56638	-0.359018	10.6934	3.56e-14	5.9e-12	22.1212
MCM7	1.33479	-0.21332	7.77552	5.55e-10	1.34e-08	12.6003
MEGF8	-1.13572	0.111512	-7.68476	7.6e-10	1.72e-08	12.291
MELK	1.4817	-0.31188	9.95179	3.78e-13	3.85e-11	19.7945
MEOX2	-1.02763	0.0045609	-10.3019	1.23e-13	1.6e-11	20.9018
MFAP4	-1.6934	-0.151141	-5.15236	5.03e-06	2.94e-05	3.64867
MGAM	-1.04587	-0.288903	-6.27694	1.03e-07	1.07e-06	7.45777
MGAT3	-1.50871	-0.149789	-6.18253	1.43e-07	1.41e-06	7.13394
MGC14436	-1.1924	-0.0309159	-7.75707	5.92e-10	1.41e-08	12.5375
MGC15705	-1.42336	-0.337527	-8.9551	1e-11	4.95e-10	16.5607
MGC16121	-1.38861	-0.280556	-5.32039	2.83e-06	1.8e-05	4.20844
MGC24103	-1.35053	-0.0377959	-4.98149	8.97e-06	4.84e-05	3.08447
MGC31957	-1.0597	-0.016594	-6.41516	6.34e-08	7.1e-07	7.9325
MGC35361	-1.00289	-0.125773	-4.86381	1.33e-05	6.8e-05	2.69923
MGC39821	-1.16871	-0.023905	-8.28186	9.77e-11	3.18e-09	14.3152
MGC50722	-1.06544	-0.292222	-4.9299	1.07e-05	5.62e-05	2.91524
MGC99813	-1.15521	0.0510578	-11.5163	2.81e-15	9.13e-13	24.6178
MICAL3	-1.13101	-0.232955	-6.25291	1.12e-07	1.15e-06	7.37532
MITF	-1.05137	0.0307462	-9.9796	3.45e-13	3.58e-11	19.8831
MLF1IP	1.95745	-0.438204	9.08882	6.42e-12	3.42e-10	17.0012
MMP1	1.3392	-0.476133	3.93639	0.000272246	0.000923714	-0.210801
MMP10	1.54282	-0.903592	3.24344	0.00217746	0.00569957	-2.18005
MMP12	2.15239	-0.791901	4.21903	0.000111156	0.000425408	0.64836
MMP16	-1.07423	-0.38387	-9.17323	4.85e-12	2.75e-10	17.2782
MMP21	1.25669	-0.384598	6.76293	1.88e-08	2.52e-07	9.12873
MMP3	1.28819	-0.589471	2.81572	0.00709273	0.0158692	-3.27521
MMP9	2.16727	-0.715118	6.07647	2.07e-07	1.93e-06	6.77068
MOCOS	1.1156	-0.330113	5.44996	1.81e-06	1.22e-05	4.64299
MRO	-1.07783	0.0917103	-6.44603	5.69e-08	6.49e-07	8.0386
MRPL47	1.1747	-0.303323	6.22867	1.22e-07	1.23e-06	7.29218
MRVI1	-1.90089	0.410309	-11.6045	2.15e-15	7.51e-13	24.8799
MS4A6E	-1.12736	-0.0832937	-7.65341	8.47e-10	1.89e-08	12.184
MSC	-1.17707	-0.0966882	-6.49729	4.76e-08	5.54e-07	8.21486
MSH2	1.01093	-0.295769	7.15473	4.79e-09	8.01e-08	10.4761
MSX1	-1.37557	0.127042	-11.8923	9.07e-16	3.63e-13	25.7278
MTHFD1	1.18613	-0.218243	8.15317	1.52e-10	4.66e-09	13.8813
MTHFD2	1.28786	-0.476852	8.66345	2.67e-11	1.11e-09	15.5934
MTHFS	1.00912	-0.269901	6.82899	1.49e-08	2.07e-07	9.35605
MUC4	1.08942	-0.622332	2.23186	0.0304345	0.0558486	-4.58591
MUSTN1	-1.03077	-0.0176291	-14.1338	1.55e-18	2.66e-15	31.9527
MX1	1.24204	-0.659836	4.40649	6.06e-05	0.00025213	1.23277
MYH1	-1.09316	-0.0396017	-6.77407	1.81e-08	2.44e-07	9.16707
MYH11	-2.12141	0.288777	-5.64608	9.23e-07	6.88e-06	5.30484
MYL1	-1.02581	-0.238098	-5.18787	4.45e-06	2.65e-05	3.76658
MYL9	-1.08404	0.0548822	-5.81105	5.21e-07	4.25e-06	5.86486
MYLK	-1.54685	-0.0731134	-5.26289	3.45e-06	2.14e-05	4.01638
MYO3A	-1.15259	-0.490343	-6.26584	1.07e-07	1.11e-06	7.41968
MYO7B	-1.15139	-0.0591446	-6.39049	6.91e-08	7.64e-07	7.84773
MYOT	-1.7923	-0.316176	-9.20142	4.42e-12	2.56e-10	17.3706
MYRIP	-1.73112	-0.218256	-9.27951	3.41e-12	2.08e-10	17.6259
NAP1L3	-1.38796	0.196168	-8.91304	1.16e-11	5.62e-10	16.4217
NAT6	-1.19124	-0.139877	-8.47687	5.03e-11	1.86e-09	14.9701
NBEA	-1.3091	-0.0156157	-4.88067	1.26e-05	6.49e-05	2.75424
NBL1	-1.17089	0.178356	-10.8339	2.29e-14	4.2e-12	22.5537
NBLA00301	-1.39888	0.14885	-8.3141	8.75e-11	2.92e-09	14.4237
NCF2	1.50289	-0.403626	5.83263	4.83e-07	3.99e-06	5.93829
NDN	-1.48774	-0.0426576	-7.1672	4.58e-09	7.7e-08	10.5189
NDP	-1.40751	0.0207506	-8.60688	3.24e-11	1.3e-09	15.4048
NEF3	-1.05141	-0.220928	-4.83737	1.46e-05	7.35e-05	2.61305
NEFH	1.483	-1.41496	2.2894	0.0265972	0.0496697	-4.46722
NEK2	1.36821	-0.25736	7.9101	3.49e-10	9.15e-09	13.058
NETO2	1.32945	-0.208582	9.22592	4.07e-12	2.41e-10	17.4508
NFIC	-1.33333	-0.244262	-7.13405	5.14e-09	8.52e-08	10.405
NFKBIE	1.29664	-0.113201	7.9675	2.87e-10	7.86e-09	13.2528
NKPD1	-1.37241	-0.158061	-7.63112	9.15e-10	2.02e-08	12.108
NKX6-2	-1.07094	0.206663	-9.61458	1.13e-12	9.03e-11	18.7136
NMB	1.03122	-0.434794	3.14598	0.00287157	0.00724469	-2.43857
NMI	1.23276	-0.360932	7.43154	1.83e-09	3.6e-08	11.4256
NOSTRIN	-1.46964	0.191354	-10.5769	5.14e-14	7.62e-12	21.7602
NP	1.15377	-0.249232	5.9067	3.74e-07	3.21e-06	6.19067
NPAS1	-1.07479	0.0925586	-8.15344	1.51e-10	4.66e-09	13.8822
NPL	1.14961	-0.375232	6.1627	1.53e-07	1.5e-06	7.06598
NPY	-1.27973	0.0751477	-12.3728	2.19e-16	1.29e-13	27.1189
NR0B1	-1.30643	-0.311681	-7.82777	4.64e-10	1.16e-08	12.7782
NR2F1	-1.97532	0.03745	-5.92835	3.46e-07	3.01e-06	6.26455
NR2F2	-1.51615	0.0429378	-8.12667	1.66e-10	5e-09	13.7917
NR3C2	-1.2451	-0.28469	-4.54425	3.86e-05	0.000171255	1.66885
NRG2	-1.48889	0.015978	-8.19759	1.3e-10	4.1e-09	14.0312
NTNG1	-1.09674	-0.0376445	-12.4445	1.78e-16	1.08e-13	27.3237
NUDT10	-1.18343	-0.0123785	-10.9472	1.61e-14	3.34e-12	22.9007
NUP107	1.00707	-0.344504	7.53798	1.26e-09	2.63e-08	11.7897
NUP155	1.0338	-0.157565	7.31969	2.69e-09	4.99e-08	11.0423
NUP62	1.04242	-0.355923	7.42997	1.84e-09	3.62e-08	11.4202
NUSAP1	1.37676	-0.17146	10.5306	5.94e-14	8.48e-12	21.6166
NUT	-1.11674	-0.382076	-5.69215	7.87e-07	6.02e-06	5.46097
NY-SAR-48	1.1258	-0.260781	9.38583	2.4e-12	1.6e-10	17.9725
OASL	1.56421	-0.358628	7.20638	4e-09	6.9e-08	10.6535
OCIAD2	1.45078	-0.469083	7.63507	9.02e-10	2e-08	12.1215
OGN	-2.74538	0.263127	-11.6969	1.63e-15	6.14e-13	25.1532
OIP5	1.57887	-0.370478	8.13239	1.63e-10	4.93e-09	13.811
OLFML1	-1.03303	0.0189752	-12.6984	8.53e-17	5.95e-14	28.0436
OLFML3	-1.01546	0.214762	-11.5872	2.27e-15	7.73e-13	24.8283
OLR1	1.35314	-0.552908	5.12453	5.53e-06	3.19e-05	3.55644
OR1L4	-1.07745	0.0668999	-6.54463	4.03e-08	4.79e-07	8.37766
OR1N2	-1.04997	-0.124327	-9.34699	2.73e-12	1.75e-10	17.8461
OR2H2	-1.00439	-0.0591253	-10.6024	4.74e-14	7.2e-12	21.8394
OR2T8	-1.24953	-0.159135	-8.77407	1.84e-11	8.26e-10	15.9613
OR4K1	-1.12526	-0.124098	-11.2142	7.06e-15	1.75e-12	23.7118
OR6K2	-1.05017	-0.0885167	-11.4183	3.78e-15	1.08e-12	24.3252
OR7D2	-1.2199	-0.278899	-7.02397	7.55e-09	1.16e-07	10.0267
OR8D2	-1.20921	-0.0785898	-9.47242	1.8e-12	1.28e-10	18.2538
OSR2	-1.25207	0.0913027	-6.62444	3.05e-08	3.79e-07	8.6522
OSTbeta	-1.02532	0.319041	-7.48865	1.5e-09	3.02e-08	11.621
OXGR1	-1.01556	0.0364844	-7.79849	5.13e-10	1.25e-08	12.6785
P2RY14	-1.15879	-0.138043	-3.92841	0.000279119	0.000942791	-0.23464
PAQR9	-1.18899	-0.162736	-7.77409	5.58e-10	1.34e-08	12.5954
PARP1	1.14991	-0.249681	9.23912	3.9e-12	2.33e-10	17.494
PARP9	1.17133	-0.340771	5.84573	4.62e-07	3.83e-06	5.98292
PAX2	-1.29292	0.168008	-8.18479	1.36e-10	4.27e-09	13.988
PBEF1	1.2428	-0.310444	4.43485	5.52e-05	0.000232667	1.32212
PBK	1.32736	-0.400668	6.38625	7.01e-08	7.73e-07	7.83316
PCDHGA3	-1.22074	-0.100298	-7.03656	7.23e-09	1.12e-07	10.07
PCDHGB2	-1.27528	-0.129192	-9.38396	2.41e-12	1.6e-10	17.9664
PCDHGC3	-1.08196	-0.232356	-6.05184	2.25e-07	2.08e-06	6.68643
PCNA	1.14558	-0.329495	7.47188	1.59e-09	3.19e-08	11.5636
PCOLCE	-1.35918	0.0394573	-8.13044	1.64e-10	4.96e-09	13.8045
PCOLCE2	-1.42491	-0.312793	-4.53594	3.97e-05	0.000175257	1.64241
PCP4	-2.01349	-0.133178	-7.24259	3.52e-09	6.25e-08	10.7778
PCSK9	2.24141	-0.774705	4.76971	1.83e-05	8.94e-05	2.3933
PCTK3	-1.06126	-0.0528059	-9.60225	1.18e-12	9.25e-11	18.6738
PDE6G	-1.03213	0.0816026	-8.60534	3.25e-11	1.3e-09	15.3996
PDE8B	-1.72498	-0.00449189	-4.96689	9.42e-06	5.05e-05	3.03652
PDE9A	-1.13868	-0.208109	-6.66546	2.64e-08	3.36e-07	8.79334
PDGFRB	-1.10109	-0.262455	-5.23064	3.85e-06	2.34e-05	3.9089
PDGFRL	-1.07071	-0.122764	-4.52943	4.05e-05	0.000178506	1.6217
PDZD4	-1.03887	-0.00214087	-8.31995	8.58e-11	2.87e-09	14.4434
PDZRN3	-1.69684	-0.223828	-7.588	1.06e-09	2.28e-08	11.9607
PGCP	-1.2706	0.00937735	-8.63557	2.94e-11	1.21e-09	15.5005
PGDS	-1.18828	-0.0463456	-6.27683	1.03e-07	1.07e-06	7.45741
PGLYRP3	-1.11865	-0.177542	-7.28792	3.01e-09	5.5e-08	10.9333
PGR	-2.04853	0.035138	-9.56651	1.32e-12	1.01e-10	18.5584
PHF21B	-1.70451	-0.137785	-10.0054	3.18e-13	3.4e-11	19.965
PHLDA2	1.4473	-0.562649	5.22366	3.94e-06	2.39e-05	3.88565
PHOX2B	-1.18913	-0.30354	-10.5507	5.58e-14	8.09e-12	21.6789
PI16	-1.53242	0.351442	-12.4639	1.68e-16	1.06e-13	27.3791
PIGS	-1.02934	0.0886927	-9.61974	1.11e-12	8.92e-11	18.7302
PIK3C2G	-1.14228	-0.0174319	-6.98966	8.51e-09	1.28e-07	9.90877
PIM2	1.56213	-0.410842	5.63618	9.55e-07	7.06e-06	5.27134
PLA2G7	1.78902	-0.427282	5.7958	5.49e-07	4.44e-06	5.81299
PLAU	2.19745	-0.614982	8.18014	1.38e-10	4.33e-09	13.9723
PLCXD3	-1.23264	-0.10884	-6.83584	1.46e-08	2.02e-07	9.37963
PLN	-1.37701	0.0860338	-8.13559	1.61e-10	4.88e-09	13.8219
PLOD2	1.16242	-0.376891	4.03819	0.000197721	0.000698662	0.0953778
PLSCR1	1.32386	-0.289498	7.05924	6.68e-09	1.05e-07	10.148
PLXNA4B	-1.32087	-0.146344	-7.18601	4.29e-09	7.31e-08	10.5835
PMP22	-1.11619	-0.050699	-5.54087	1.33e-06	9.35e-06	4.9492
PNMT	-1.46338	-0.180031	-8.55612	3.84e-11	1.49e-09	15.2352
POLE2	1.01272	-0.292658	7.6255	9.33e-10	2.04e-08	12.0888
POLR2H	1.12972	-0.196665	5.86374	4.34e-07	3.62e-06	6.04425
POTE15	-1.03962	-0.276666	-4.61739	3.03e-05	0.000138943	1.90247
POU3F1	-1.02053	-0.189752	-6.36443	7.57e-08	8.29e-07	7.75818
POU3F4	-1.14826	-0.0977744	-7.56822	1.14e-09	2.41e-08	11.8931
PPAP2B	-1.90281	-0.0710895	-7.62299	9.41e-10	2.06e-08	12.0802
PPAPDC3	-1.19879	-0.200095	-9.60785	1.16e-12	9.19e-11	18.6919
PPP1R14A	-1.25247	-0.13242	-5.70458	7.53e-07	5.81e-06	5.50312
PPP1R3C	-2.22883	-0.505309	-5.92029	3.56e-07	3.08e-06	6.23703
PRAMEF3	-1.25036	-0.168156	-5.31526	2.88e-06	1.83e-05	4.19127
PRC1	1.66619	-0.495204	9.81798	5.83e-13	5.33e-11	19.3673
PRICKLE1	-1.12142	0.100891	-8.62638	3.03e-11	1.24e-09	15.4698
PRICKLE2	-1.47599	-0.182806	-9.16333	5.01e-12	2.84e-10	17.2458
PRL	-1.17183	-0.15359	-8.87651	1.31e-11	6.28e-10	16.3009
PRO1768	-1.0304	-0.0696688	-5.98817	2.81e-07	2.51e-06	6.46877
PRSS23	-1.2334	-0.104817	-4.87011	1.31e-05	6.69e-05	2.71977
PSAT1	1.09622	-0.521945	4.26059	9.72e-05	0.0003795	0.776998
PSCDBP	1.20369	-0.249462	4.32224	7.97e-05	0.000318975	0.968784
PSMB2	1.05109	-0.329022	8.36716	7.3e-11	2.53e-09	14.6021
PSMB3	1.03539	-0.441923	8.30947	8.89e-11	2.95e-09	14.4081
PSMB9	1.54243	-0.280369	6.6603	2.69e-08	3.41e-07	8.77561
PSME2	1.21523	-0.415719	7.68086	7.7e-10	1.74e-08	12.2777
PTAFR	1.02281	-0.0504498	5.7236	7.05e-07	5.49e-06	5.56768
PTGDS	-1.69478	-0.242303	-6.11476	1.81e-07	1.72e-06	6.90175
PTGIS	-1.33353	-0.250175	-8.92411	1.11e-11	5.45e-10	16.4583
PTN	-1.7196	-0.126298	-4.63863	2.83e-05	0.000130752	1.97055
PTPRB	-1.15495	-0.223176	-5.35639	2.5e-06	1.62e-05	4.32893
PTTG1	1.879	-0.511971	9.30874	3.09e-12	1.93e-10	17.7214
PTTG2	1.87171	-0.369174	8.87173	1.33e-11	6.32e-10	16.2851
RAB17	-1.18654	-0.175927	-5.78352	5.73e-07	4.6e-06	5.77123
RAB3C	-1.10213	-0.101759	-9.49586	1.67e-12	1.21e-10	18.3297
RACGAP1	1.46931	-0.176903	10.6837	3.67e-14	5.93e-12	22.0912
RAD51	1.7083	-0.362658	9.87575	4.83e-13	4.57e-11	19.552
RAD51AP1	1.39736	-0.289546	8.08288	1.93e-10	5.69e-09	13.6437
RAD54L	1.82042	-0.307998	9.8837	4.71e-13	4.52e-11	19.5774
RAI2	-1.54054	0.0935799	-9.11438	5.9e-12	3.19e-10	17.0852
RAMP1	-1.19754	-0.151085	-4.13989	0.000143185	0.000530113	0.404992
RAN	1.0146	-0.278761	7.73618	6.36e-10	1.49e-08	12.4663
RANBP1	1.00806	-0.277848	7.88606	3.79e-10	9.79e-09	12.9763
RAPGEF3	-1.06378	-0.0946875	-7.40655	1.99e-09	3.87e-08	11.3399
RARRES1	1.22661	-0.797863	2.33804	0.0236964	0.0449746	-4.36501
RBM24	-1.03157	-0.103055	-12.0785	5.21e-16	2.43e-13	26.2706
RBP1	1.07561	-0.428424	3.24213	0.0021856	0.00571848	-2.18354
RBPMS	-1.15703	0.0935944	-6.94416	9.98e-09	1.47e-07	9.75227
RCC2	1.12294	-0.237362	8.02693	2.34e-10	6.62e-09	13.4543
RDH10	1.20153	-0.617155	3.31423	0.00177628	0.00477007	-1.98916
RDH12	-1.55718	-0.278046	-6.65639	2.73e-08	3.45e-07	8.76214
RECK	-1.57075	0.0183186	-7.44786	1.73e-09	3.43e-08	11.4814
RECQL4	1.22468	-0.0573759	8.38685	6.83e-11	2.39e-09	14.6682
REG3A	-1.09557	-0.0116514	-9.42841	2.08e-12	1.42e-10	18.1109
REG3G	-1.14144	-0.160553	-7.02401	7.55e-09	1.16e-07	10.0269
RELB	1.21379	-0.295307	6.43979	5.82e-08	6.61e-07	8.01717
REV3L	-1.053	-0.0253683	-7.01013	7.93e-09	1.21e-07	9.97913
RFC4	1.53363	-0.331234	7.7732	5.6e-10	1.35e-08	12.5924
RFC5	1.08158	-0.271409	7.84748	4.33e-10	1.09e-08	12.8452
RGN	-1.05719	0.217379	-4.88812	1.23e-05	6.36e-05	2.77858
RGS1	1.01497	-0.464913	3.17546	0.00264221	0.00674185	-2.3609
RIT2	-1.39597	-0.23676	-9.60574	1.16e-12	9.22e-11	18.6851
RLN1	-1.10043	-0.311457	-6.86964	1.29e-08	1.83e-07	9.49593
RMI1	1.21657	-0.591124	6.3922	6.87e-08	7.61e-07	7.85361
RNASEH2A	1.05202	-0.297443	6.47306	5.18e-08	5.97e-07	8.13153
RNF150	-1.33083	0.160478	-6.05989	2.19e-07	2.03e-06	6.71396
ROR1	-1.0297	-0.057596	-7.17266	4.5e-09	7.59e-08	10.5377
RP11-561O23.4	1.12785	0.0161046	5.1854	4.49e-06	2.67e-05	3.75838
RP1-93H18.5	1.50239	-0.602178	4.84231	1.43e-05	7.25e-05	2.62914
RP4-724E16.2	-1.10305	-0.0504762	-7.27878	3.11e-09	5.63e-08	10.9019
RP5-1022P6.2	1.03549	-0.326693	5.17203	4.7e-06	2.78e-05	3.71397
RPE65	-1.32689	-0.255154	-6.87311	1.28e-08	1.8e-07	9.50785
RPESP	-1.25514	-0.179539	-8.11609	1.72e-10	5.16e-09	13.756
RPIB9	-1.00217	0.116943	-10.8425	2.23e-14	4.17e-12	22.58
RPRM	-1.112	-0.282583	-6.05187	2.25e-07	2.08e-06	6.68652
RPS4Y2	-1.29207	-0.112457	-8.30217	9.11e-11	3.01e-09	14.3836
RPS6KA6	-1.28353	-0.11545	-9.99194	3.32e-13	3.51e-11	19.9223
RRM1	1.09318	-0.286788	6.7304	2.11e-08	2.77e-07	9.01679
RRM2	1.47232	-0.417919	8.85289	1.41e-11	6.62e-10	16.2227
RS1	-1.11345	-0.217403	-7.74702	6.13e-10	1.45e-08	12.5032
RSAD2	1.03953	-0.344588	3.7365	0.000505178	0.00159378	-0.800458
RSPO1	-1.07435	0.154972	-6.01078	2.6e-07	2.35e-06	6.54603
RTN1	-1.2458	-0.187042	-7.31142	2.77e-09	5.1e-08	11.0139
RUNX1T1	-1.18886	0.0529522	-10.0286	2.95e-13	3.21e-11	20.0386
S100A11	1.00905	-0.366553	5.35513	2.51e-06	1.62e-05	4.32472
S100A2	2.09008	-0.300251	4.5935	3.28e-05	0.000148664	1.826
S100P	1.93995	-1.52627	3.15564	0.00279446	0.00707191	-2.41318
SALL2	-1.22187	-0.192841	-4.53831	3.94e-05	0.00017394	1.64993
SAMD9L	1.04116	-0.406718	3.79048	0.000428085	0.00137708	-0.642808
SAT	1.49094	-0.515705	6.78532	1.74e-08	2.37e-07	9.20578
SCGB1D1	-2.65549	-1.29493	-5.37114	2.38e-06	1.55e-05	4.37834
SCGB1D2	-2.39464	-1.00957	-5.57217	1.19e-06	8.53e-06	5.05489
SCGB2A1	-2.47076	-0.948004	-4.89323	1.21e-05	6.26e-05	2.79525
SCGB3A1	-1.99648	-0.265237	-6.25751	1.1e-07	1.14e-06	7.3911
SCO2	1.0628	-0.229977	5.02965	7.62e-06	4.21e-05	3.24296
SCTR	-1.31427	0.0872789	-6.708	2.28e-08	2.96e-07	8.93973
SCUBE1	-1.15453	-0.464896	-5.79259	5.55e-07	4.48e-06	5.80207
SCUBE2	-1.64095	-0.276903	-6.93365	1.04e-08	1.51e-07	9.7161
SDPR	-1.15162	0.0255092	-9.154	5.17e-12	2.9e-10	17.2152
SEMA7A	-1.34962	-0.323731	-6.27105	1.05e-07	1.09e-06	7.43755
SEPP1	-1.18689	-0.0407746	-3.62568	0.000707389	0.00213794	-1.12026
SERPINA11	-1.38102	-0.151611	-8.51988	4.35e-11	1.64e-09	15.1141
SERPINB5	1.21435	-0.443199	3.89178	0.000312886	0.00104375	-0.343764
SERPINF1	-1.12371	0.0285455	-5.76827	6.04e-07	4.8e-06	5.71938
SFRP1	-1.84824	-0.0168668	-6.20183	1.34e-07	1.33e-06	7.20012
SFRP4	-2.34044	-0.263729	-5.41355	2.06e-06	1.36e-05	4.52062
SGCE	-1.02835	-0.0674988	-5.18169	4.55e-06	2.7e-05	3.74605
SGTB	-1.02328	-0.136983	-8.26051	1.05e-10	3.38e-09	14.2433
SH3GL2	-1.1622	0.00888641	-6.93414	1.03e-08	1.51e-07	9.7178
SHC3	-1.36256	-0.332862	-4.68527	2.42e-05	0.000114307	2.12051
SHMT2	1.05087	-0.266018	8.30158	9.13e-11	3.01e-09	14.3816
SLAMF7	1.20226	-0.428214	4.29806	8.62e-05	0.000341304	0.893416
SLAMF8	1.30515	-0.42338	5.51943	1.43e-06	9.95e-06	4.8769
SLC12A3	-1.00826	-0.0984236	-10.8892	1.93e-14	3.71e-12	22.7235
SLC16A9	-1.60014	-0.154855	-6.87419	1.27e-08	1.8e-07	9.51156
SLC17A1	-1.17637	-0.113119	-5.92875	3.46e-07	3e-06	6.26589
SLC22A8	-1.19617	-0.183493	-8.26344	1.04e-10	3.35e-09	14.2532
SLC25A5	1.15757	-0.295979	6.8938	1.19e-08	1.7e-07	9.57905
SLC26A10	-1.02253	-0.037189	-9.31891	2.99e-12	1.88e-10	17.7545
SLC28A1	-1.3144	-0.189119	-8.03509	2.27e-10	6.47e-09	13.4819
SLC2A1	1.5932	-0.840614	4.32662	7.86e-05	0.000315284	0.982468
SLC2A13	-1.09153	0.033004	-10.8543	2.15e-14	4.06e-12	22.6163
SLC2A6	-1.18126	-0.123925	-6.40119	6.66e-08	7.4e-07	7.8845
SLC31A2	1.12592	-0.319733	5.16089	4.88e-06	2.87e-05	3.67697
SLC36A2	-1.11109	-0.110077	-8.76442	1.9e-11	8.46e-10	15.9292
SLC4A2	-1.29578	-0.0625094	-8.6079	3.23e-11	1.3e-09	15.4082
SLC6A3	-1.18349	-0.0727321	-6.35511	7.82e-08	8.53e-07	7.72619
SLC7A14	-1.01662	-0.209517	-11.4811	3.13e-15	9.98e-13	24.5129
SLC7A9	-1.24885	-0.0369523	-9.33788	2.81e-12	1.79e-10	17.8163
SLIT2	-1.69545	0.0553648	-7.5741	1.11e-09	2.37e-08	11.9132
SLITRK4	-1.14052	-0.0644774	-8.07774	1.96e-10	5.76e-09	13.6263
SLITRK5	-1.18334	-0.230936	-6.09808	1.92e-07	1.81e-06	6.84465
SLURP1	-1.1535	-0.220684	-4.76947	1.83e-05	8.95e-05	2.39253
SMC4	1.07706	-0.367827	5.32806	2.76e-06	1.76e-05	4.2341
SMOC2	-1.35158	-0.0608258	-4.09647	0.000164396	0.00059611	0.272379
SNRPA1	1.09471	-0.404773	5.99755	2.72e-07	2.44e-06	6.50083
SNTG2	-1.3145	-0.266555	-6.22095	1.25e-07	1.26e-06	7.26568
SNX10	1.18429	-0.339213	4.75093	1.95e-05	9.42e-05	2.33248
SNX5	1.01766	-0.329304	7.35405	2.39e-09	4.52e-08	11.16
SOCS2	-1.16938	-0.21934	-4.95116	9.94e-06	5.28e-05	2.9849
SOD2	1.72806	-0.529426	6.68488	2.47e-08	3.17e-07	8.86016
SPAG10	-1.24025	-0.10911	-8.06471	2.05e-10	5.95e-09	13.5822
SPAG5	1.73739	-0.288696	11.6132	2.1e-15	7.45e-13	24.9056
SPARCL1	-1.80229	-0.416285	-5.89358	3.91e-07	3.32e-06	6.14595
SPATA8	-1.10914	-0.144307	-8.82019	1.58e-11	7.27e-10	16.1143
SPBC25	1.39132	-0.273257	7.68034	7.71e-10	1.74e-08	12.2759
SPEG	-1.21305	-0.0906499	-5.15714	4.95e-06	2.9e-05	3.66455
SPERT	-1.05463	-0.303204	-4.84265	1.43e-05	7.24e-05	2.63024
SPI1	-1.07018	0.0411132	-6.4778	5.09e-08	5.89e-07	8.14783
SPINK5	-1.91978	-1.07098	-2.92404	0.00530387	0.0123067	-3.0078
SPINT2	1.04553	-0.449822	4.78287	1.75e-05	8.6e-05	2.43595
SPON1	-1.4725	-0.147878	-5.09135	6.18e-06	3.53e-05	3.44662
SPP1	1.43488	-0.71445	3.1169	0.00311611	0.00777933	-2.51472
SPRR3	-1.7411	-1.50322	-2.37019	0.0219382	0.0421214	-4.29654
SPRY2	-1.10682	-0.118728	-5.65473	8.95e-07	6.7e-06	5.33414
SPTBN5	-1.06304	-0.150323	-5.08681	6.28e-06	3.57e-05	3.4316
SQRDL	1.11077	-0.294997	5.95579	3.15e-07	2.77e-06	6.3582
SRMS	-1.14657	-0.0481932	-8.54101	4.05e-11	1.54e-09	15.1847
SRPK1	1.02581	-0.21989	5.65291	9.01e-07	6.74e-06	5.32799
SRPX	-1.04627	-0.316734	-5.59874	1.09e-06	7.91e-06	5.14469
SRY	-1.11404	-0.161735	-8.53695	4.1e-11	1.56e-09	15.1712
SSPN	-1.31695	0.235768	-6.81852	1.55e-08	2.13e-07	9.32002
SSX6	-1.38153	-0.289653	-7.90988	3.49e-10	9.15e-09	13.0572
SSX7	-1.2797	-0.126164	-8.32354	8.47e-11	2.85e-09	14.4555
ST6GALNAC3	-1.17062	0.218058	-8.72027	2.21e-11	9.45e-10	15.7825
STAG3	1.37153	-0.684001	3.53532	0.000927678	0.00271524	-1.37702
STAT1	1.75957	-0.287121	7.31887	2.7e-09	5e-08	11.0394
STMN1	1.55368	-0.356465	7.83611	4.5e-10	1.13e-08	12.8065
STYK1	1.486	-0.266167	6.6973	2.36e-08	3.06e-07	8.9029
SUHW4	-1.13951	-0.296427	-6.33828	8.29e-08	8.97e-07	7.66839
SULF1	1.27596	-0.4336	4.40975	6e-05	0.000249848	1.24304
SULT1E1	-1.08251	-0.195423	-3.07038	0.00354848	0.00870192	-2.63559
SUNC1	-1.25081	-0.201286	-5.16965	4.74e-06	2.8e-05	3.70607
SYCP2	1.37717	-0.515741	3.53213	0.000936529	0.00273865	-1.386
SYNC1	-1.04097	0.0608353	-7.77809	5.5e-10	1.33e-08	12.6091
SYNPO2	-1.38407	0.138165	-7.88541	3.8e-10	9.8e-09	12.9741
SYT10	-1.14431	-0.23924	-6.68476	2.47e-08	3.17e-07	8.85975
SYTL4	-1.08654	-0.161414	-6.11449	1.81e-07	1.72e-06	6.90085
TAC3	-1.01359	-0.18702	-6.5766	3.6e-08	4.36e-07	8.48764
TACSTD2	1.32321	-0.591732	3.82903	0.000380094	0.00124028	-0.529471
TAP1	1.6058	-0.400976	6.3689	7.45e-08	8.18e-07	7.77356
TAS2R13	-1.02188	-0.06559	-9.96658	3.6e-13	3.69e-11	19.8416
TAS2R43	-1.21256	0.077082	-9.8829	4.72e-13	4.52e-11	19.5748
tcag7.981	-1.23413	-0.0268767	-8.339	8.04e-11	2.74e-09	14.5075
TCAM1	1.92171	-1.01033	3.88444	0.00032011	0.00106427	-0.365563
TCEAL1	-1.24382	0.107929	-8.57332	3.63e-11	1.42e-09	15.2927
TCEAL2	-1.37927	0.12656	-7.93604	3.19e-10	8.58e-09	13.1461
TCEAL3	-1.0791	0.151596	-5.89963	3.83e-07	3.27e-06	6.16658
TCEAL5	-1.11822	0.0165175	-6.21263	1.29e-07	1.29e-06	7.23715
TCEAL6	-1.10968	0.170415	-6.08827	1.98e-07	1.87e-06	6.81108
TCEB3B	-1.17571	-0.0403616	-9.64991	1.01e-12	8.22e-11	18.8275
TCL1A	1.22814	-0.489254	5.39286	2.21e-06	1.45e-05	4.4512
TECTA	-1.072	-0.242418	-7.86589	4.07e-10	1.04e-08	12.9078
TEK	-1.16165	-0.240746	-9.91192	4.3e-13	4.29e-11	19.6675
TEKT3	-1.28967	-0.242722	-6.93916	1.02e-08	1.49e-07	9.73508
TENC1	-1.51083	0.12731	-12.7107	8.23e-17	5.95e-14	28.0785
TEX12	-1.20277	-0.228542	-8.60608	3.25e-11	1.3e-09	15.4021
TFF3	-1.80019	-0.900447	-3.1313	0.00299267	0.00751297	-2.47707
TFRC	1.29713	-0.415364	5.37978	2.31e-06	1.51e-05	4.40733
TGFBR3	-1.34619	0.0992007	-10.1187	2.21e-13	2.54e-11	20.3245
THOC3	1.02303	-0.427995	5.62522	9.92e-07	7.3e-06	5.23426
THSD4	-1.28768	0.00360926	-9.49844	1.66e-12	1.21e-10	18.3381
TIE1	-1.08268	-0.0863683	-10.5738	5.19e-14	7.64e-12	21.7507
TK1	2.37068	-0.465131	9.40736	2.23e-12	1.5e-10	18.0425
TLR2	1.14768	-0.204894	6.169	1.5e-07	1.47e-06	7.08757
TM4SF5	-1.0162	0.00813585	-10.2162	1.61e-13	1.98e-11	20.6323
TMEM132A	1.31029	-0.23737	6.86093	1.33e-08	1.87e-07	9.46596
TMEM47	-1.18799	0.0358889	-7.0872	6.06e-09	9.7e-08	10.2441
TMOD1	-1.3351	0.0825152	-6.64062	2.88e-08	3.61e-07	8.70788
TMPRSS11B	-1.99249	-0.220527	-6.08855	1.98e-07	1.87e-06	6.81205
TMPRSS11F	-1.00674	-0.198701	-6.77509	1.8e-08	2.44e-07	9.17058
TMPRSS4	1.27205	-0.636314	3.66763	0.000623076	0.0019124	-0.999823
TMSB4Y	-1.04624	-0.232975	-9.30744	3.11e-12	1.93e-10	17.7171
TNFAIP2	1.19313	-0.53963	5.73344	6.82e-07	5.33e-06	5.60108
TNFRSF12A	1.20384	-0.191515	4.69874	2.31e-05	0.000109963	2.16391
TNFRSF21	1.16051	-0.144647	5.57135	1.19e-06	8.55e-06	5.05211
TNFSF10	1.59901	-0.616276	5.01084	8.12e-06	4.45e-05	3.181
TNFSF7	1.60491	-0.31175	5.26063	3.47e-06	2.15e-05	4.00884
TNS4	1.22348	-0.593279	3.79289	0.000424917	0.00136829	-0.635732
TOP2A	1.68359	-0.339744	8.5627	3.76e-11	1.46e-09	15.2573
TPM3	1.01192	-0.134831	9.09313	6.33e-12	3.39e-10	17.0154
TPX2	1.72561	-0.296933	12.1768	3.9e-16	2.04e-13	26.5554
TRBV5-4	1.08479	-0.454628	4.10272	0.000161169	0.00058678	0.291404
TRH	-1.45554	-0.0111884	-9.97391	3.52e-13	3.62e-11	19.865
TRHDE	-1.01452	-0.320884	-5.57709	1.17e-06	8.41e-06	5.0715
TRIM59	1.27244	-0.297672	8.4192	6.12e-11	2.19e-09	14.7768
TRIM73	1.26406	-0.495602	5.417	2.03e-06	1.35e-05	4.53222
TRO	-1.06097	-0.0898652	-5.05871	6.91e-06	3.87e-05	3.3388
TROAP	1.05426	-0.147894	9.36028	2.61e-12	1.7e-10	17.8893
TRPC1	-1.4188	0.094278	-6.69152	2.41e-08	3.11e-07	8.88301
TSPYL5	-1.18666	-0.250349	-5.08338	6.35e-06	3.6e-05	3.42027
TTK	1.42238	-0.297665	7.53738	1.27e-09	2.63e-08	11.7877
TTTY3	1.02029	-0.24471	5.2908	3.13e-06	1.97e-05	4.10954
TTTY6	-1.00735	-0.127404	-7.5671	1.14e-09	2.41e-08	11.8893
TUBB2B	-1.83506	-0.1975	-8.76087	1.93e-11	8.47e-10	15.9175
TYMS	1.9987	-0.628534	9.30071	3.18e-12	1.96e-10	17.6952
TYRP1	-1.27862	-0.15208	-8.35392	7.64e-11	2.63e-09	14.5576
UBD	3.27021	-0.762189	6.73551	2.07e-08	2.73e-07	9.03439
UBE2C	2.31327	-0.3712	12.6204	1.07e-16	6.94e-14	27.8236
UBE2S	1.09668	0.149605	7.09245	5.95e-09	9.55e-08	10.2621
UBE2T	1.95471	-0.428188	10.4518	7.63e-14	1.07e-11	21.3711
UCK2	1.58497	-0.578591	9.08079	6.59e-12	3.49e-10	16.9748
UCP2	-1.00425	-0.0556839	-5.03442	7.5e-06	4.15e-05	3.25866
UGT2A3	-1.00756	-0.371857	-6.8766	1.26e-08	1.79e-07	9.51987
UGT2B7	-1.19307	-0.270545	-5.44665	1.84e-06	1.24e-05	4.63186
UNQ467	-1.89532	-0.986807	-3.21555	0.0023579	0.0061005	-2.25454
UNQ9433	-1.08065	-0.0858245	-6.90733	1.13e-08	1.63e-07	9.62558
UPK1B	-1.06781	-0.271393	-7.51656	1.36e-09	2.79e-08	11.7165
USP18	1.66672	-0.465788	6.52255	4.35e-08	5.11e-07	8.30173
USP51	-1.12615	0.014179	-8.07487	1.98e-10	5.79e-09	13.6165
UST	-1.20147	-0.29013	-6.61299	3.17e-08	3.91e-07	8.6128
VCPIP1	1.02449	-0.235529	11.8551	1.01e-15	3.9e-13	25.6188
VEGF	1.19838	-0.234085	5.08603	6.3e-06	3.58e-05	3.42903
VIM	-1.08636	0.0160995	-5.46746	1.71e-06	1.16e-05	4.70185
VIPR1	-1.29565	-0.138168	-6.0948	1.94e-07	1.83e-06	6.83343
VIT	-1.06952	-0.0114276	-6.41127	6.43e-08	7.18e-07	7.91913
VMD2L3	-1.01437	-0.0801039	-8.25867	1.06e-10	3.39e-09	14.2371
VRK1	1.08285	-0.416	8.31182	8.82e-11	2.93e-09	14.4161
WARS	1.59935	-0.468768	5.74451	6.56e-07	5.15e-06	5.63865
WBSCR17	-1.07582	0.0277766	-8.91085	1.16e-11	5.65e-10	16.4145
WBSCR28	-1.05551	-0.183185	-8.54617	3.98e-11	1.53e-09	15.202
WDHD1	1.29615	-0.282846	8.85512	1.4e-11	6.59e-10	16.2301
WDR27	-1.03935	0.0261691	-7.50684	1.41e-09	2.86e-08	11.6833
WFIKKN1	-1.03623	0.094777	-11.423	3.73e-15	1.08e-12	24.3393
WISP2	-2.60848	-0.197616	-6.9947	8.36e-09	1.27e-07	9.92607
ZC3H12D	1.11128	-0.33036	6.33751	8.32e-08	8.98e-07	7.66573
ZFP14	-1.0602	-0.0408886	-6.35132	7.92e-08	8.63e-07	7.71317
ZFPM2	-1.06042	-0.236145	-8.19925	1.29e-10	4.08e-09	14.0368
ZNF101	1.06897	-0.33354	9.31228	3.06e-12	1.91e-10	17.7329
ZNF135	-1.0307	-0.0276564	-15.2141	8.97e-20	2.82e-16	34.7199
ZNF165	1.14457	-0.405107	5.41196	2.07e-06	1.37e-05	4.51528
ZNF214	-1.06849	-0.0349131	-6.16771	1.5e-07	1.48e-06	7.08317
ZNF239	-1.00875	-0.161439	-5.05303	7.04e-06	3.94e-05	3.32003
ZNF257	-1.08807	-0.0973963	-7.27525	3.15e-09	5.68e-08	10.8898
ZNF38	-1.03794	-0.140738	-4.78541	1.73e-05	8.54e-05	2.4442
ZNF44	-1.29406	-0.152239	-9.19164	4.56e-12	2.64e-10	17.3386
ZNF491	-1.09271	-0.156079	-6.84455	1.41e-08	1.97e-07	9.40961
ZNF516	-1.00735	-0.458278	-5.16456	4.82e-06	2.84e-05	3.68916
ZNF521	-1.21271	-0.0721894	-11.2567	6.2e-15	1.58e-12	23.8399
ZNF570	-1.28114	-0.0864669	-8.57827	3.57e-11	1.4e-09	15.3093
ZNF683	1.2355	-0.671124	3.00412	0.00426219	0.0101902	-2.80563
ZNF704	-1.3303	0.123731	-6.53392	4.19e-08	4.95e-07	8.34081
ZNF76	-1.07732	-0.00235874	-6.12907	1.72e-07	1.65e-06	6.95077
ZWILCH	1.06649	-0.273588	7.35465	2.39e-09	4.51e-08	11.1621
ZWINT	1.79275	-0.311271	10.095	2.38e-13	2.72e-11	20.2494
