# Supplementary material for: Identification of Potential Hub Genes and miRNA-mRNA Pairs Related to the Progression and Prognosis of Cervical Cancer Through Integrated Bioinformatics Analysis
Source: Front Genet. 2021 Dec 22;12:775006. doi: 10.3389/fgene.2021.775006 (PMC8727538; doi:10.3389/fgene.2021.775006)
Supplement: Supplementary file 15 [file Table8.XLSX]

## Sheet: supplementary material 4
Tag	logFC	AveExpr	t	P.Value	adj.P.Val	B
hsa-miR-3137	5.95506	-0.154928	20.7497	4.5e-10	9.02e-07	12.6458
hsa-miR-1226-5p	5.70881	-0.278055	17.3841	2.91e-09	2.92e-06	11.2649
hsa-miR-7-5p	-6.3162	-0.00899897	-13.9962	2.78e-08	1.86e-05	9.41019
hsa-miR-18a-5p	-5.24651	-0.551642	-9.69014	1.13e-06	0.000568905	6.0256
hsa-miR-20b-5p	-2.59531	5.34609	-9.25125	1.78e-06	0.000601374	5.59143
hsa-miR-196a-5p	-6.59945	0.656679	-9.24313	1.8e-06	0.000601374	5.58321
hsa-miR-19b-3p	-1.92405	7.52577	-8.71197	3.18e-06	0.000912653	5.02988
hsa-miR-93-5p	-2.143	5.48275	-7.98535	7.28e-06	0.00182499	4.22057
hsa-miR-15a-5p	-2.12352	7.11518	-7.57773	1.19e-05	0.0026434	3.7382
hsa-miR-3188	6.21094	1.1583	7.38925	1.5e-05	0.00300069	3.50789
hsa-miR-4695-5p	5.38955	-0.437683	6.99145	2.48e-05	0.00430679	3.00617
hsa-miR-20a-5p	-1.66537	8.22235	-6.96057	2.58e-05	0.00430679	2.96631
hsa-miR-106b-5p	-2.39874	6.64298	-6.72135	3.52e-05	0.00534728	2.65306
hsa-miR-590-5p	-4.00819	1.84115	-6.67815	3.73e-05	0.00534728	2.59563
hsa-miR-92a-3p	-1.25929	6.36388	-6.58406	4.23e-05	0.00565932	2.46961
hsa-miR-17-5p	-1.81374	6.80002	-6.52032	4.61e-05	0.00578097	2.38353
hsa-miR-6068	1.81821	5.87737	6.43435	5.18e-05	0.00611367	2.26649
hsa-miR-21-5p	-2.26996	11.9822	-6.36854	5.67e-05	0.00631713	2.17617
hsa-miR-15b-5p	-1.83006	8.918	-5.72034	0.000141769	0.0149679	1.25244
hsa-miR-3653	-4.92336	1.32143	-5.64571	0.000158137	0.0158612	1.14208
hsa-miR-4655-3p	5.08812	-0.588402	5.48667	0.000200126	0.0189264	0.904085
hsa-miR-2861	1.54265	7.24455	5.4531	0.000210421	0.0189264	0.853366
hsa-miR-1185-2-3p	4.99282	0.607671	5.42241	0.000220325	0.0189264	0.806856
hsa-miR-19a-3p	-3.53049	3.5054	-5.40419	0.000226437	0.0189264	0.779184
hsa-miR-363-3p	-3.47462	3.99456	-5.3499	0.000245749	0.0197189	0.696403
hsa-miR-638	1.83127	7.41615	5.16182	0.000327359	0.0234186	0.406284
hsa-miR-205-3p	-5.00604	-0.747706	-5.14501	0.00033594	0.0234186	0.380097
hsa-miR-25-3p	-1.56153	7.14355	-4.99488	0.000424024	0.0234186	0.144427
hsa-miR-96-5p	-4.94598	3.24224	-4.85899	0.000524967	0.0234186	-0.0717079
hsa-miR-154-5p	4.28537	0.0317011	4.78693	0.000588523	0.0234186	-0.187362
hsa-miR-16-5p	-1.23356	10.142	-4.7597	0.000614619	0.0234186	-0.231268
hsa-miR-141-3p	-2.57843	6.97575	-4.72242	0.000652334	0.0234186	-0.291529
hsa-miR-654-3p	4.31729	-0.361674	4.65918	0.000721995	0.0234186	-0.394184
hsa-miR-4284	-1.3119	7.93711	-4.57703	0.0008244	0.0234186	-0.528351
hsa-miR-4253	4.63723	-0.813847	4.57175	0.000831491	0.0234186	-0.537012
hsa-miR-30e-5p	-1.52501	5.02924	-4.46391	0.000991099	0.0234186	-0.714557
hsa-miR-3651	-1.96212	4.95415	-4.41726	0.00106983	0.0234186	-0.791818
hsa-miR-542-5p	4.98857	-0.638174	4.40693	0.00108815	0.0234186	-0.808972
hsa-miR-299-5p	4.58655	-0.839185	4.38616	0.00112596	0.0234186	-0.843487
hsa-miR-301a-3p	-4.35155	-0.628663	-4.36518	0.00116555	0.0234186	-0.878407
hsa-miR-3194-5p	4.46128	0.0247922	4.33322	0.0012287	0.0234186	-0.931704
hsa-miR-195-5p	2.17543	8.346	4.29596	0.00130688	0.0234186	-0.993995
hsa-miR-1229-5p	1.12718	7.16701	4.27573	0.00135148	0.0234186	-1.02788
hsa-miR-381-3p	4.91431	0.604075	4.18624	0.0015688	0.0234186	-1.17837
hsa-miR-2276	4.4693	-0.00398695	4.17391	0.0016015	0.0234186	-1.19918
hsa-miR-130b-3p	-2.06657	4.17651	-4.14252	0.00168798	0.0234186	-1.25223
hsa-miR-1915-3p	1.0247	7.39664	4.03182	0.00203394	0.0234186	-1.44013
hsa-miR-557	3.73437	-1.26528	3.96744	0.00226844	0.0234186	-1.55
hsa-miR-1224-5p	2.0709	5.08988	3.9316	0.00241102	0.0234186	-1.61134
hsa-miR-100-5p	2.1245	7.69778	3.92011	0.00245866	0.0234186	-1.63102
hsa-miR-183-5p	-3.42407	3.17202	-3.88893	0.00259297	0.0234186	-1.68451
hsa-miR-664b-3p	-1.69925	3.07399	-3.86601	0.00269656	0.0234186	-1.72389
hsa-miR-146a-5p	-4.60054	2.90968	-3.82502	0.00289262	0.0234186	-1.79441
hsa-miR-361-3p	-3.88118	1.16657	-3.75928	0.00323852	0.0234186	-1.90781
hsa-miR-3911	5.04981	1.54168	3.74891	0.00329686	0.0234186	-1.92573
hsa-miR-142-3p	-3.36124	4.83266	-3.74067	0.00334402	0.0234186	-1.93998
hsa-miR-1183	4.21731	0.665855	3.72171	0.00345522	0.0234186	-1.97279
hsa-miR-497-5p	1.8461	5.87725	3.64428	0.00395027	0.0234186	-2.10697
hsa-miR-224-5p	-2.60914	4.55834	-3.62454	0.00408784	0.0234186	-2.14124
hsa-miR-425-5p	-1.26926	4.42884	-3.62297	0.00409901	0.0234186	-2.14397
hsa-miR-222-3p	-1.62173	4.21278	-3.58474	0.00438048	0.0234186	-2.21043
hsa-miR-200c-3p	-1.73902	7.6608	-3.56084	0.0045665	0.0234186	-2.25202
hsa-miR-31-5p	-1.79451	5.23719	-3.54791	0.00467045	0.0234186	-2.27452
hsa-miR-4687-3p	1.60279	8.48739	3.53867	0.00474627	0.0234186	-2.29061
hsa-miR-135b-5p	-5.12502	0.149071	-3.50952	0.00499385	0.0234186	-2.34141
hsa-miR-5001-5p	1.22086	4.98887	3.50795	0.00500757	0.0234186	-2.34415
hsa-miR-376a-3p	4.65005	1.57833	3.48474	0.00521472	0.0234186	-2.38462
hsa-miR-134	1.3067	4.88873	3.47799	0.00527669	0.0234186	-2.39641
hsa-miR-625-5p	-3.96131	-0.00643775	-3.44255	0.00561422	0.0234186	-2.45826
hsa-miR-342-3p	-1.29772	6.61944	-3.42701	0.00576914	0.0234186	-2.4854
hsa-miR-146b-5p	-4.9029	3.11245	-3.39771	0.00607328	0.0234186	-2.53659
hsa-miR-3656	1.0525	6.03759	3.39502	0.00610201	0.0234186	-2.54129
hsa-miR-17-3p	-3.49481	-1.50332	-3.39362	0.00611695	0.0234186	-2.54372
hsa-miR-142-5p	-4.98516	-0.758142	-3.39065	0.00614893	0.0234186	-2.54891
hsa-miR-575	1.38729	5.56584	3.38505	0.0062097	0.0234186	-2.55871
hsa-miR-181a-5p	-1.40217	5.37101	-3.37717	0.00629621	0.0234186	-2.57248
hsa-let-7c	1.54262	10.0075	3.37439	0.00632707	0.0234186	-2.57735
hsa-miR-4317	-3.42374	-0.468776	-3.35728	0.0065201	0.0234186	-2.60726
hsa-miR-155-5p	-2.34269	4.83504	-3.32033	0.00695795	0.0234186	-2.6719
hsa-miR-331-3p	-1.44541	5.85674	-3.29221	0.00731114	0.0234186	-2.72109
hsa-miR-127-3p	4.48768	1.82529	3.26801	0.00762967	0.0234186	-2.76344
hsa-miR-1227-5p	4.74674	2.68183	3.25911	0.00775037	0.0234186	-2.77901
hsa-miR-4698	3.88677	1.35196	3.24369	0.0079642	0.0234186	-2.80601
hsa-miR-1207-5p	1.10705	7.93932	3.22077	0.00829304	0.0234186	-2.84613
hsa-miR-6722-3p	3.71626	0.33178	3.21321	0.00840455	0.0234186	-2.85937
hsa-miR-376c-3p	3.60177	4.04593	3.19559	0.00867038	0.0234186	-2.89021
hsa-miR-4745-5p	3.37437	0.860595	3.14913	0.00941299	0.0234186	-2.97154
hsa-miR-4522	3.90967	-1.17763	3.11986	0.00991356	0.0234186	-3.02276
hsa-miR-342-5p	-3.6348	0.0453199	-3.1112	0.0100669	0.0234186	-3.03792
hsa-miR-4647	4.63004	-0.817441	3.10692	0.0101435	0.0234186	-3.04541
hsa-miR-3659	3.84796	-1.20848	3.1022	0.0102286	0.0234186	-3.05365
hsa-miR-4672	4.45193	1.38761	3.09719	0.0103199	0.0234186	-3.06243
hsa-miR-1275	1.18465	5.13297	3.09441	0.0103707	0.0234186	-3.06728
hsa-miR-21-3p	-3.9852	3.65923	-3.07503	0.0107332	0.0234186	-3.10118
hsa-miR-3196	1.06639	6.13132	3.07495	0.0107349	0.0234186	-3.10133
hsa-miR-601	3.65065	1.03541	3.06559	0.0109145	0.0234186	-3.1177
hsa-miR-660-5p	-1.69156	2.8393	-3.06383	0.0109485	0.0234186	-3.12076
hsa-miR-221-5p	-3.4417	-0.620025	-3.04807	0.0112589	0.0234186	-3.14832
hsa-miR-3654	4.45872	-0.9031	3.03886	0.0114444	0.0234186	-3.16442
hsa-miR-548q	3.67429	-1.29532	3.02272	0.011777	0.0234186	-3.19263
hsa-miR-218-5p	3.60523	2.33731	3.01896	0.0118557	0.0234186	-3.19919
hsa-miR-4476	3.8222	-1.22136	3.01101	0.0120242	0.0234186	-3.21308
hsa-miR-1260a	-1.59514	7.76599	-3.00913	0.0120643	0.0234186	-3.21636
hsa-miR-202-3p	4.01125	1.03345	2.98982	0.0124853	0.0234186	-3.2501
hsa-miR-4728-5p	1.55883	3.83106	2.94921	0.0134189	0.0234186	-3.32095
hsa-miR-4516	1.8907	11.4019	2.93609	0.0137355	0.0234186	-3.34383
hsa-miR-4534	4.57733	2.67995	2.92844	0.0139235	0.0234186	-3.35717
hsa-miR-4532	3.51243	2.59975	2.89837	0.0146877	0.0234186	-3.40954
hsa-miR-4646-5p	4.13298	1.25814	2.89772	0.0147047	0.0234186	-3.41068
hsa-miR-205-5p	-1.77735	10.1322	-2.89163	0.0148648	0.0234186	-3.42129
hsa-miR-200b-3p	-1.73087	7.65501	-2.88976	0.0149142	0.0234186	-3.42453
hsa-miR-181b-5p	-3.78763	2.62155	-2.87032	0.0154385	0.0234186	-3.45835
hsa-miR-28-5p	-1.69609	4.41527	-2.84342	0.0161947	0.0234186	-3.50511
hsa-miR-6512-5p	3.40703	1.12988	2.84295	0.0162084	0.0234186	-3.50594
hsa-miR-18b-5p	-2.87437	-1.81354	-2.83064	0.016567	0.0234186	-3.52732
hsa-miR-1202	1.27203	9.15732	2.80012	0.0174905	0.0234186	-3.58026
hsa-miR-4739	1.2231	7.35137	2.79004	0.0178068	0.0236247	-3.59774
hsa-miR-1225-5p	1.07618	7.81146	2.78749	0.0178876	0.0237162	-3.60215
hsa-miR-6089	1.17409	11.3955	2.76827	0.0185092	0.0245079	-3.63543
hsa-miR-4481	2.53955	-1.86269	2.75302	0.0190178	0.0251647	-3.66181
hsa-miR-4449	-3.11354	-0.407505	-2.75253	0.0190344	0.0251701	-3.66266
hsa-miR-6087	1.09414	9.44126	2.73863	0.0195106	0.0257828	-3.6867
hsa-miR-379-5p	3.40028	-1.43232	2.70372	0.020759	0.0273964	-3.74695
hsa-miR-5787	1.29977	6.56065	2.69965	0.0209097	0.0275771	-3.75397
hsa-miR-4734	2.71689	0.16854	2.67295	0.021925	0.0288925	-3.79994
hsa-miR-572	3.61526	3.14918	2.67267	0.0219358	0.0288925	-3.80042
hsa-miR-199b-5p	1.34818	6.19363	2.67222	0.0219532	0.0288964	-3.80119
hsa-miR-4505	1.05863	6.64935	2.66681	0.0221651	0.0291371	-3.8105
hsa-miR-766-3p	-3.33111	0.00446872	-2.64677	0.0229679	0.0301726	-3.84494
hsa-miR-4665-5p	3.81254	-0.153262	2.64601	0.0229989	0.0301936	-3.84625
hsa-miR-605	2.57452	-1.22204	2.62829	0.0237335	0.0311172	-3.87665
hsa-miR-377-3p	2.67401	-1.02949	2.62555	0.0238493	0.0312486	-3.88135
hsa-miR-31-3p	-2.89575	3.4085	-2.61772	0.0241828	0.031665	-3.89477
hsa-miR-148b-3p	-3.21818	0.179021	-2.60936	0.0245439	0.0321168	-3.90909
hsa-miR-4634	1.16113	6.16234	2.58008	0.0258514	0.0338057	-3.95915
hsa-miR-495-3p	2.17282	-2.04605	2.57188	0.02623	0.0342784	-3.97316
hsa-miR-1236-5p	3.58536	0.852793	2.54482	0.0275175	0.0359376	-4.01929
hsa-miR-371b-5p	3.89517	2.44152	2.53995	0.0277559	0.0362254	-4.02758
hsa-miR-4741	1.25561	6.45443	2.52725	0.0283866	0.0370244	-4.04918
hsa-miR-378i	-1.19359	4.45087	-2.51885	0.0288117	0.0375545	-4.06345
hsa-miR-3652	3.24034	0.241209	2.51536	0.0289902	0.0377626	-4.06938
hsa-miR-4758-5p	3.09474	0.776197	2.49183	0.0302218	0.0393413	-4.10929
hsa-miR-197-3p	-1.00174	4.19561	-2.47196	0.0313012	0.0406936	-4.1429
hsa-miR-4327	3.05057	2.02221	2.4481	0.0326477	0.0424167	-4.18319
hsa-miR-6086	3.43026	1.74123	2.44301	0.0329423	0.0427717	-4.19177
hsa-miR-432-5p	2.56109	-1.85192	2.41633	0.0345286	0.0448023	-4.23665
hsa-miR-513c-5p	1.58163	-2.34165	2.41041	0.0348903	0.0452424	-4.24659
hsa-miR-582-5p	-3.41074	-1.54535	-2.39813	0.0356529	0.0462014	-4.26719
hsa-miR-3917	1.87831	-2.1933	2.38812	0.0362862	0.0469917	-4.28395
hsa-miR-424-5p	1.23209	5.80698	2.3592	0.0381789	0.0493472	-4.33228
hsa-miR-671-5p	3.48299	2.06481	2.33871	0.0395778	0.0511223	-4.36642
hsa-miR-185-5p	-1.22028	4.13076	-2.33492	0.0398413	0.0514297	-4.37271
hsa-miR-4649-3p	-2.27299	-2.03928	-2.3327	0.0399967	0.0515789	-4.37639
hsa-miR-429	-2.9004	3.49076	-2.33254	0.0400083	0.0515789	-4.37667
hsa-miR-99a-5p	2.22577	8.66045	2.33047	0.0401534	0.0517326	-4.3801
hsa-miR-409-3p	3.63982	-0.607375	2.32922	0.0402417	0.0518131	-4.38218
hsa-miR-128	-3.06595	0.368885	-2.32861	0.0402851	0.0518358	-4.3832
hsa-miR-151a-3p	-1.20663	3.97152	-2.28058	0.0438196	0.0562393	-4.46271
hsa-miR-3907	-2.90514	-0.8502	-2.27357	0.0443599	0.0568965	-4.47427
hsa-miR-362-3p	-2.33718	-2.08213	-2.26469	0.0450536	0.0577123	-4.4889
hsa-miR-181c-5p	-2.78842	-0.921796	-2.26119	0.0453295	0.0580287	-4.49465
hsa-miR-4430	3.08248	-1.59122	2.23086	0.0477927	0.061104	-4.54443
hsa-miR-337-5p	2.74676	-1.75908	2.22439	0.0483344	0.0617572	-4.55501
hsa-miR-454-3p	-2.85386	-0.976532	-2.22383	0.0483814	0.0617779	-4.55593
hsa-miR-370	2.3472	-1.95886	2.22232	0.048509	0.0618621	-4.5584
hsa-miR-16-2-3p	-2.33894	-2.08125	-2.21949	0.0487483	0.0621278	-4.56302
